# Supplementary material for: Measurement of NET formation in vitro and in vivo by flow cytometry
Source: PubMed Central journal article supplement — Cytometry A. 2017 Jul 17;91(8):822–9. doi: 10.1002/cyto.a.23169 (PMC5601186; doi:10.1002/cyto.a.23169), 2017-07-17
Supplement: CYTO-91-822-s001.pdf [file CYTO-91-822-s001.pdf]

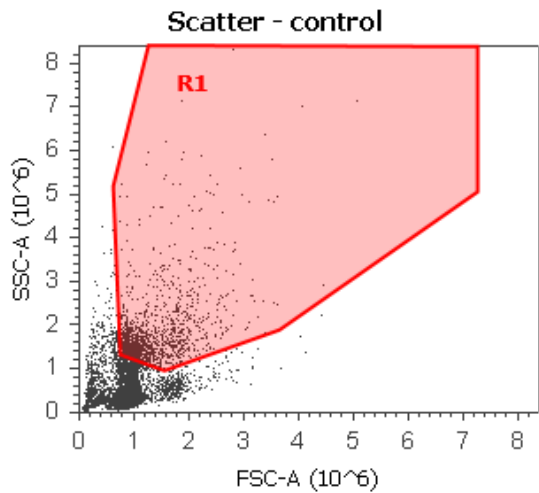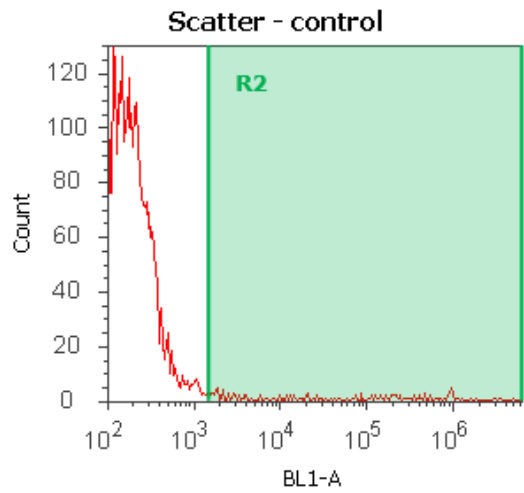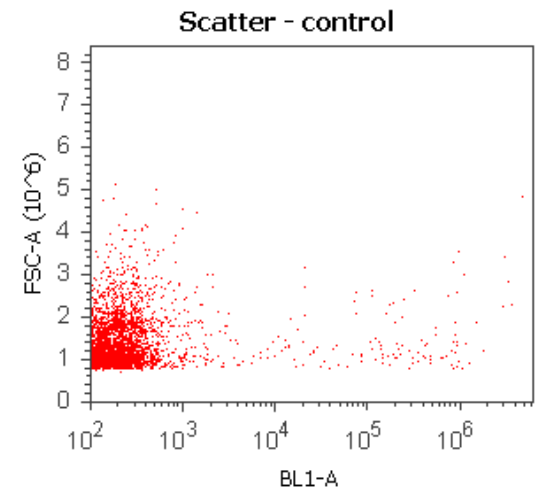

Experiment Name: **02-05-2016 05 00 PM**

Specimen Name: **Specimen**

Sample Name: **control**

| Name                                           | Event Count | % Parent | % Total  | Mean X    | Mean Y    | Median X  | Median Y  |
|------------------------------------------------|-------------|----------|----------|-----------|-----------|-----------|-----------|
| <input checked="" type="checkbox"/> All Events | 50,000      | ---      | 100.000% | 986,776   | 736,766   | 918,684   | 416,180   |
| <input checked="" type="checkbox"/> R1         | 10,033      | 20.066%  | 20.066%  | 1,341,281 | 1,796,886 | 1,154,733 | 1,543,503 |
| <input type="checkbox"/> R2                    | 157         | 1.565%   | 0.314%   | 353,646   | ---       | 75,604    | ---       |

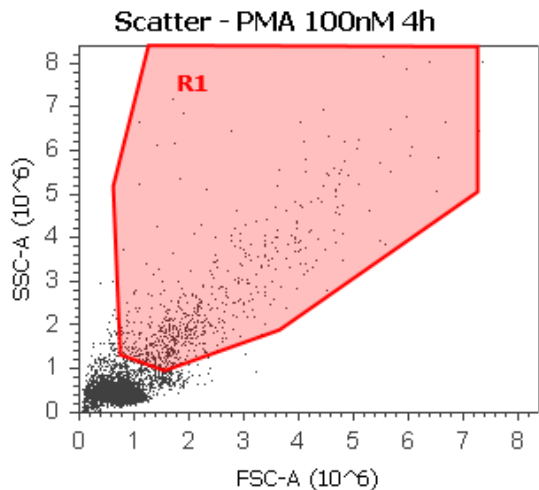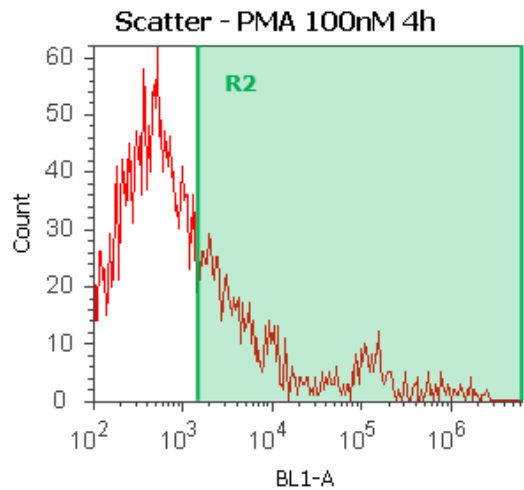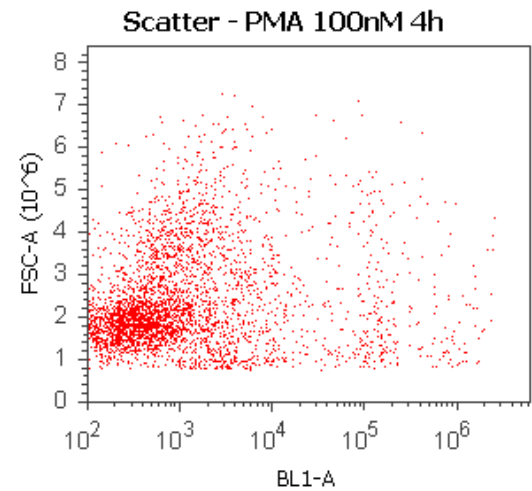

Experiment Name: **02-05-2016 05 00 PM**

Specimen Name: **Specimen**

Sample Name: **PMA 100nM 4h**

|                                     | Name       | Event Count | % Parent | % Total  | Mean X    | Mean Y    | Median X  | Median Y  |
|-------------------------------------|------------|-------------|----------|----------|-----------|-----------|-----------|-----------|
| <input checked="" type="checkbox"/> | All Events | 50,000      | ---      | 100.000% | 923,435   | 624,079   | 806,633   | 408,946   |
| <input checked="" type="checkbox"/> | R1         | 4,535       | 9.070%   | 9.070%   | 2,247,766 | 2,324,354 | 1,918,475 | 1,887,963 |
| <input type="checkbox"/>            | R2         | 1,162       | 25.623%  | 2.324%   | 97,212    | ---       | 5,173     | ---       |

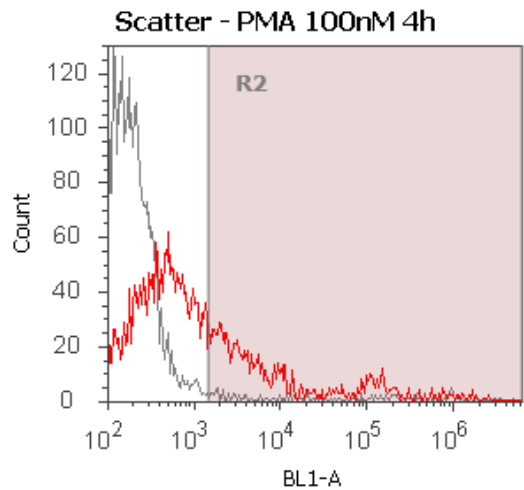

Experiment Name: **02-05-2016 05 00 PM**

Specimen Name: **Specimen**

Sample Name: **PMA 100nM 4h**

| Name                                           | Event Count | % Parent | % Total  | Mean X    | Mean Y    | Median X  | Median Y  |
|------------------------------------------------|-------------|----------|----------|-----------|-----------|-----------|-----------|
| <input checked="" type="checkbox"/> All Events | 50,000      | ---      | 100.000% | 923,435   | 624,079   | 806,633   | 408,946   |
| <input checked="" type="checkbox"/> R1         | 4,535       | 9.070%   | 9.070%   | 2,247,766 | 2,324,354 | 1,918,475 | 1,887,963 |
| <input type="checkbox"/> R2                    | 1,162       | 25.623%  | 2.324%   | 97,212    | ---       | 5,173     | ---       |

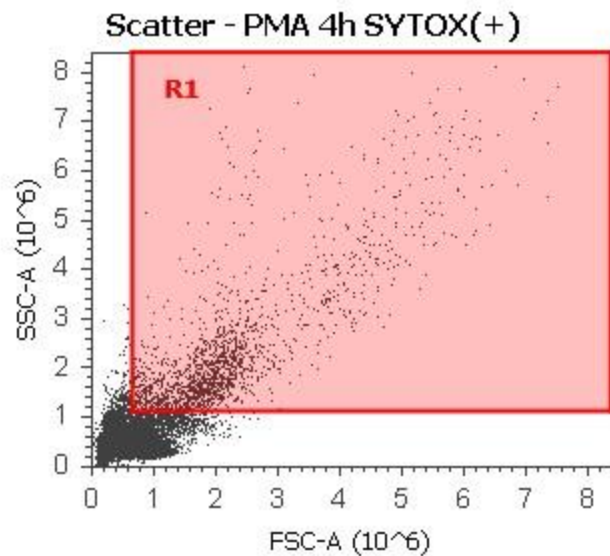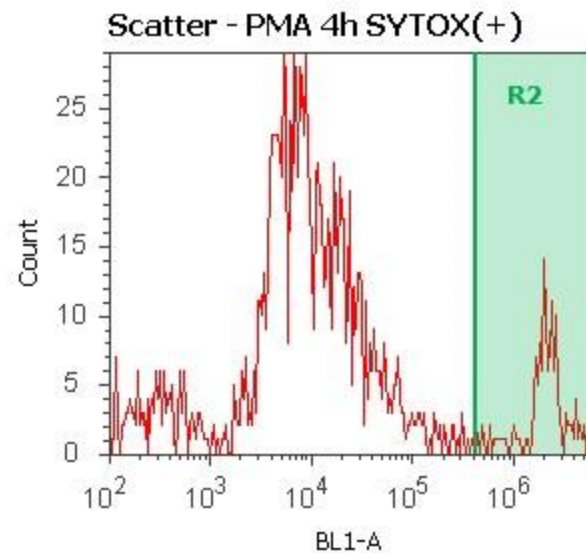

Experiment Name: **07-13-2015 05 00 PM**

Specimen Name: **Specimen**

Sample Name: **PMA 4h SYTOX(+)**

| Name                                           | Event Count | % Parent | % Total  | Mean X    | Mean Y    | Median X  | Median Y  |
|------------------------------------------------|-------------|----------|----------|-----------|-----------|-----------|-----------|
| <input checked="" type="checkbox"/> All Events | 20,000      | ---      | 100.000% | 870,977   | 687,203   | 744,721   | 489,865   |
| <input checked="" type="checkbox"/> R1         | 1,752       | 8.760%   | 8.760%   | 2,251,358 | 2,356,933 | 1,985,273 | 1,870,934 |
| <input type="checkbox"/> R                     | 158         | 9.018%   | 0.790%   | 2,319,283 | ---       | 2,141,737 | ---       |

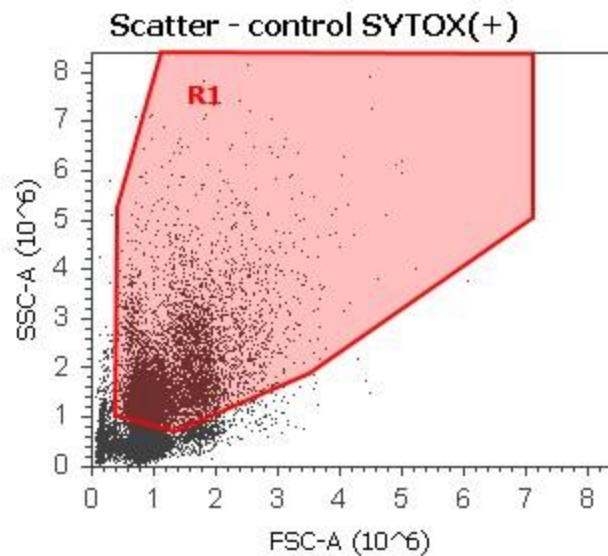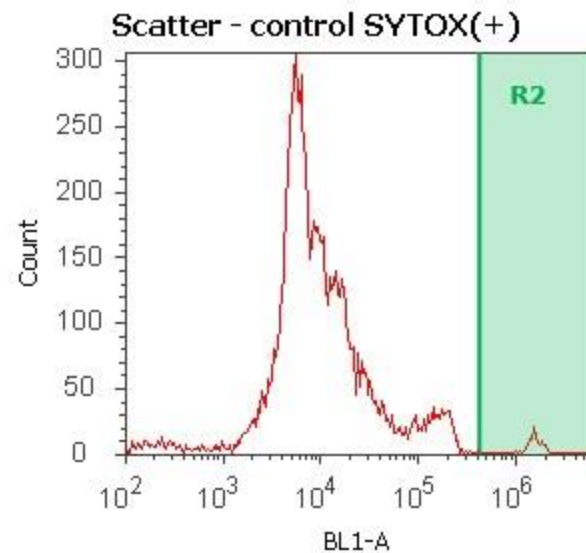

Experiment Name: **07-13-2015 05 00 PM(1)**

Specimen Name: **Specimen**

Sample Name: **control SYTOX(+)**

| Name                                           | Event Count | % Parent | % Total  | Mean X    | Mean Y    | Median X  | Median Y  |
|------------------------------------------------|-------------|----------|----------|-----------|-----------|-----------|-----------|
| <input checked="" type="checkbox"/> All Events | 20,000      | ---      | 100.000% | 1,064,436 | 1,133,478 | 943,032   | 1,044,064 |
| <input checked="" type="checkbox"/> R1         | 11,046      | 55.230%  | 55.230%  | 1,167,919 | 1,678,278 | 952,472   | 1,413,875 |
| <input type="checkbox"/> R                     | 129         | 1.168%   | 0.645%   | 1,612,958 | ---       | 1,565,694 | ---       |

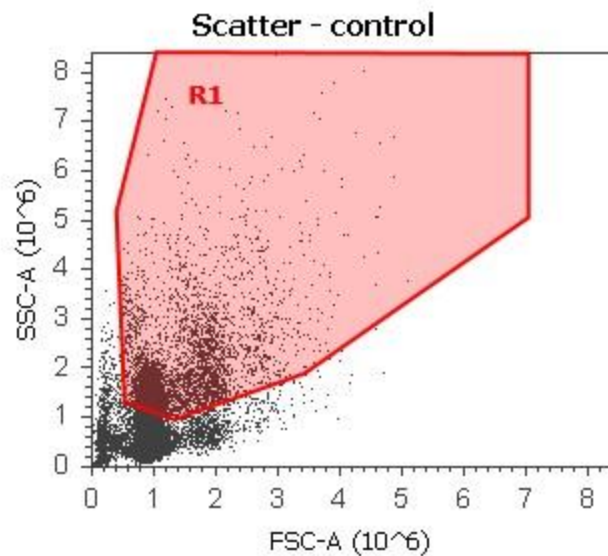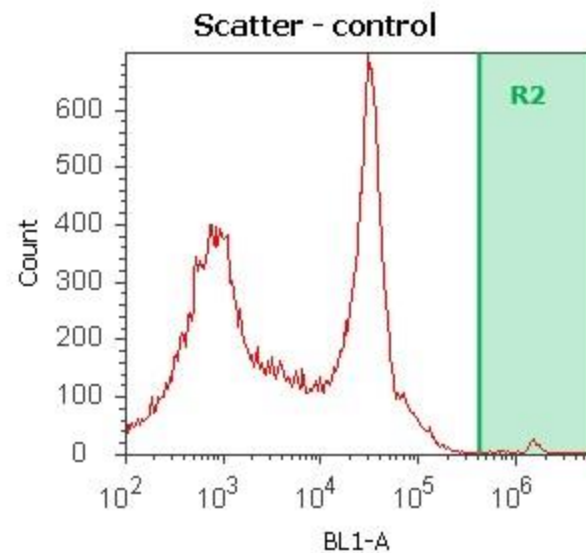

Experiment Name: **09-03-2015 05 00 PM(3)**

Specimen Name: **Specimen**

Sample Name: **control**

| Name                                           | Event Count | % Parent | % Total  | Mean X    | Mean Y    | Median X  | Median Y  |
|------------------------------------------------|-------------|----------|----------|-----------|-----------|-----------|-----------|
| <input checked="" type="checkbox"/> All Events | 100,000     | ---      | 100.000% | 1,131,333 | 1,070,479 | 1,012,677 | 893,500   |
| <input checked="" type="checkbox"/> R1         | 40,589      | 40.589%  | 40.589%  | 1,323,439 | 1,845,002 | 1,070,677 | 1,543,703 |
| <input type="checkbox"/> R2                    | 208         | 0.512%   | 0.208%   | 1,447,577 | ---       | 1,501,820 | ---       |



Experiment Name: **02-05-2016 05 00 PM**

Specimen Name: **Specimen**

Sample Name: **control**

| Name                                           | Event Count | % Parent | % Total  | Mean X    | Mean Y    | Median X  | Median Y  |
|------------------------------------------------|-------------|----------|----------|-----------|-----------|-----------|-----------|
| <input checked="" type="checkbox"/> All Events | 50,000      | ---      | 100.000% | 986,776   | 736,766   | 918,684   | 416,180   |
| <input checked="" type="checkbox"/> R1         | 10,033      | 20.066%  | 20.066%  | 1,341,281 | 1,796,886 | 1,154,733 | 1,543,503 |
| <input type="checkbox"/> R2                    | 157         | 1.565%   | 0.314%   | 353,646   | ---       | 75,604    | ---       |

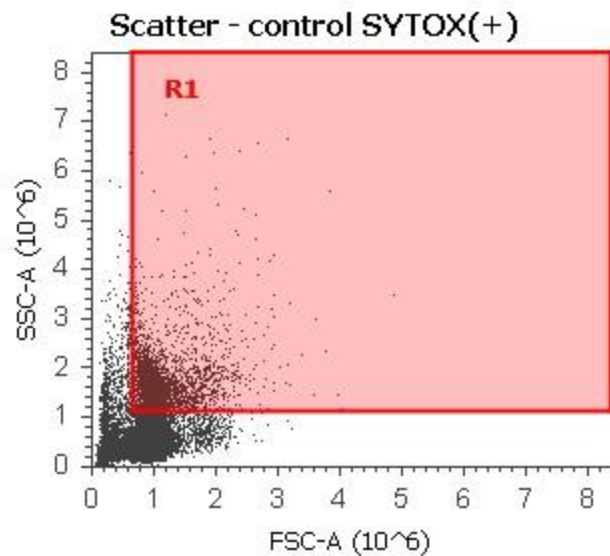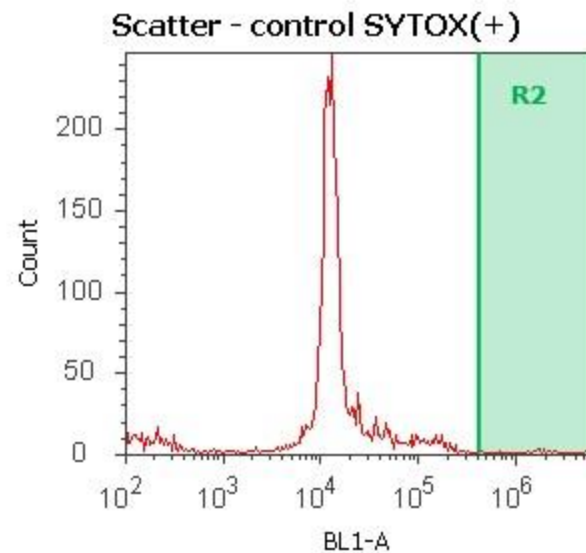

Experiment Name: **07-13-2015 05 00 PM**

Specimen Name: **Specimen**

Sample Name: **control SYTOX(+)**

| Name                                           | Event Count | % Parent | % Total  | Mean X    | Mean Y    | Median X  | Median Y  |
|------------------------------------------------|-------------|----------|----------|-----------|-----------|-----------|-----------|
| <input checked="" type="checkbox"/> All Events | 20,000      | ---      | 100.000% | 966,639   | 725,390   | 986,747   | 460,606   |
| <input checked="" type="checkbox"/> R1         | 4,110       | 20.550%  | 20.550%  | 1,151,965 | 1,663,173 | 1,035,495 | 1,543,131 |
| <input type="checkbox"/> R                     | 27          | 0.657%   | 0.135%   | 1,998,916 | ---       | 1,774,626 | ---       |



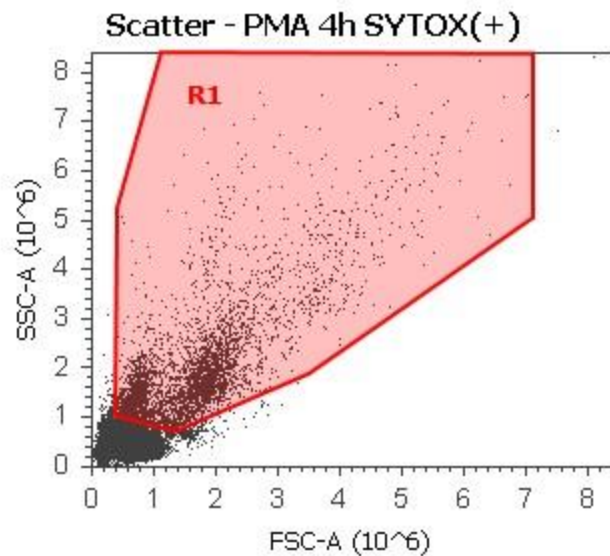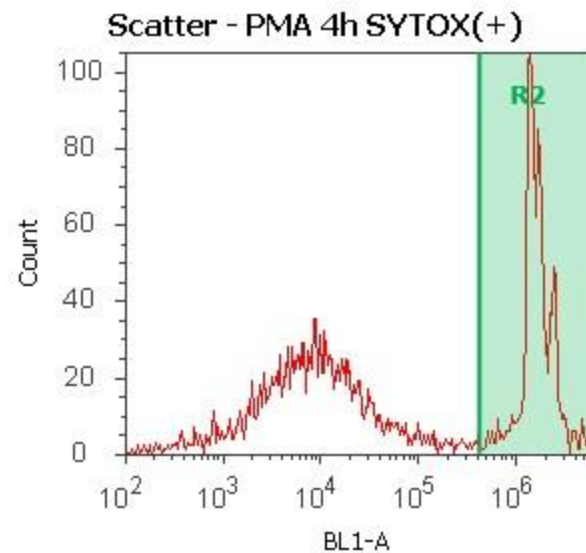

Experiment Name: **07-13-2015 05 00 PM(1)**

Specimen Name: **Specimen**

Sample Name: **PMA 4h SYTOX(+)**

| Name                                           | Event Count | % Parent | % Total  | Mean X    | Mean Y    | Median X  | Median Y  |
|------------------------------------------------|-------------|----------|----------|-----------|-----------|-----------|-----------|
| <input checked="" type="checkbox"/> All Events | 20,000      | ---      | 100.000% | 867,355   | 756,692   | 689,168   | 426,186   |
| <input checked="" type="checkbox"/> R1         | 3,912       | 19.560%  | 19.560%  | 1,739,377 | 2,051,017 | 1,646,146 | 1,685,297 |
| <input type="checkbox"/> R                     | 1,271       | 32.490%  | 6.355%   | 1,831,334 | ---       | 1,644,178 | ---       |

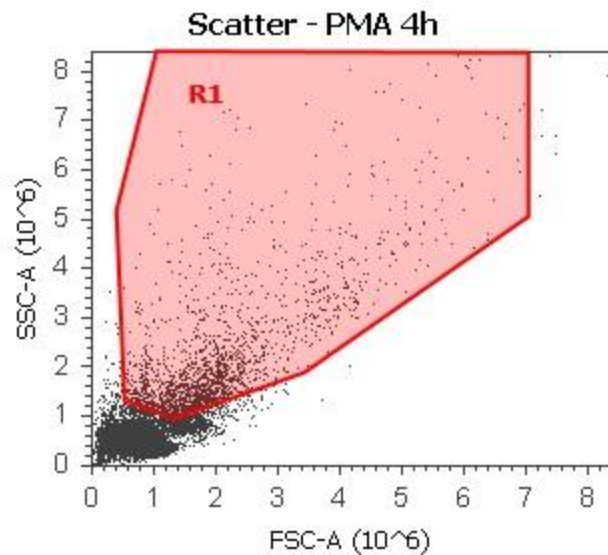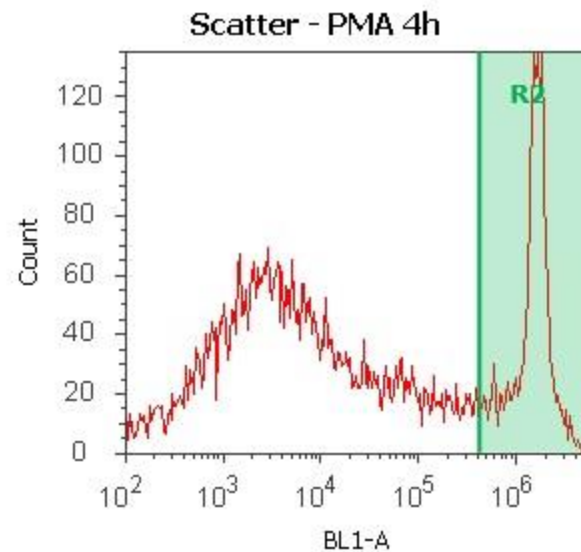

Experiment Name: **09-03-2015 05 00 PM(3)**

Specimen Name: **Specimen**

Sample Name: **PMA 4h**

| Name                                           | Event Count | % Parent | % Total  | Mean X    | Mean Y    | Median X  | Median Y  |
|------------------------------------------------|-------------|----------|----------|-----------|-----------|-----------|-----------|
| <input checked="" type="checkbox"/> All Events | 100,000     | ---      | 100.000% | 984,902   | 721,602   | 822,746   | 455,581   |
| <input checked="" type="checkbox"/> R1         | 12,684      | 12.684%  | 12.684%  | 2,089,298 | 2,173,423 | 1,842,123 | 1,713,997 |
| <input checked="" type="checkbox"/> R2         | 2,011       | 15.855%  | 2.011%   | 1,627,390 | ---       | 1,614,357 | ---       |

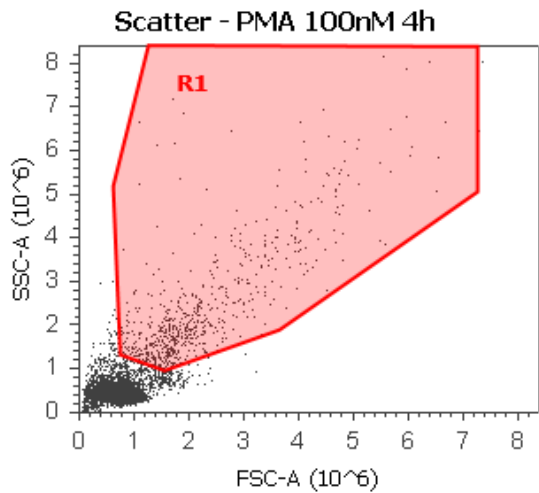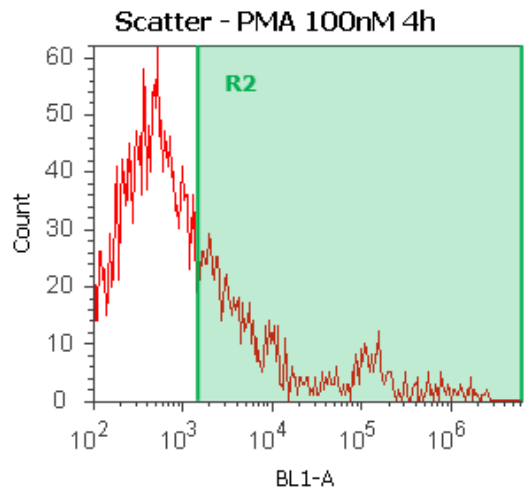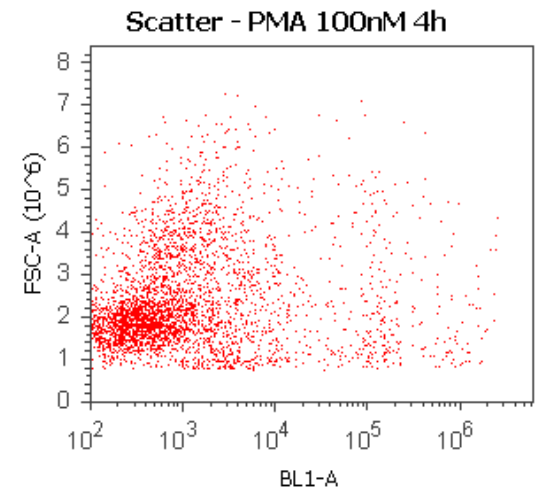

Experiment Name: **02-05-2016 05 00 PM**

Specimen Name: **Specimen**

Sample Name: **PMA 100nM 4h**

|                                     | Name       | Event Count | % Parent | % Total  | Mean X    | Mean Y    | Median X  | Median Y  |
|-------------------------------------|------------|-------------|----------|----------|-----------|-----------|-----------|-----------|
| <input checked="" type="checkbox"/> | All Events | 50,000      | ---      | 100.000% | 923,435   | 624,079   | 806,633   | 408,946   |
| <input checked="" type="checkbox"/> | R1         | 4,535       | 9.070%   | 9.070%   | 2,247,766 | 2,324,354 | 1,918,475 | 1,887,963 |
| <input type="checkbox"/>            | R2         | 1,162       | 25.623%  | 2.324%   | 97,212    | ---       | 5,173     | ---       |



Experiment Name: **02-05-2016 05 00 PM**

Specimen Name: **Specimen**

Sample Name: **control**

| Name                                           | Event Count | % Parent | % Total  | Mean X    | Mean Y    | Median X  | Median Y  |
|------------------------------------------------|-------------|----------|----------|-----------|-----------|-----------|-----------|
| <input checked="" type="checkbox"/> All Events | 50,000      | ---      | 100.000% | 986,776   | 736,766   | 918,684   | 416,180   |
| <input checked="" type="checkbox"/> R1         | 10,033      | 20.066%  | 20.066%  | 1,341,281 | 1,796,886 | 1,154,733 | 1,543,503 |
| <input type="checkbox"/> R2                    | 157         | 1.565%   | 0.314%   | 353,646   | ---       | 75,604    | ---       |

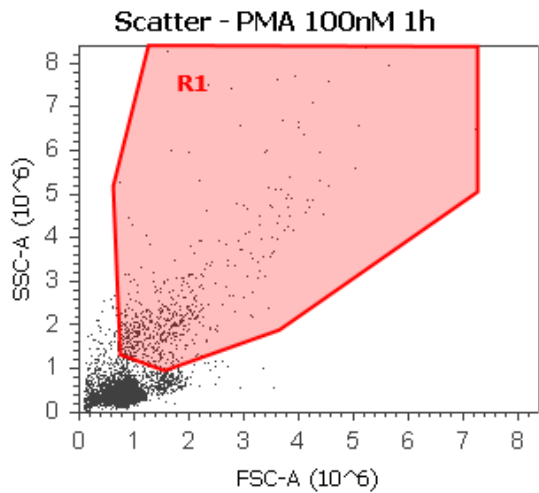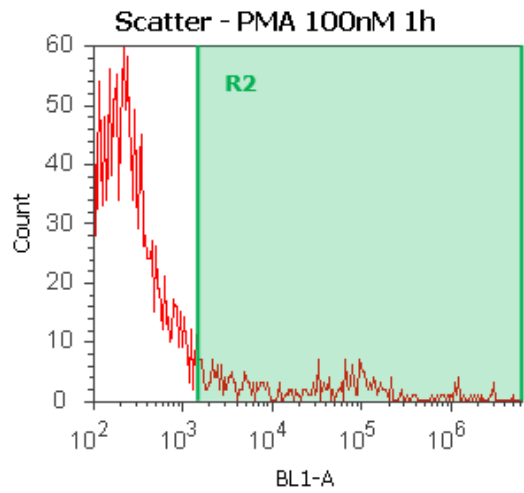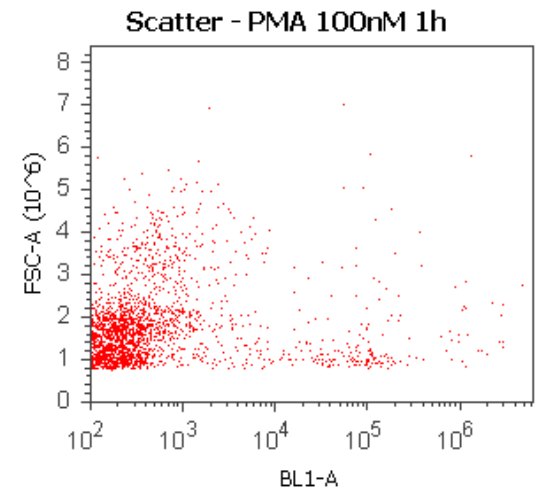

Experiment Name: **02-05-2016 05 00 PM**

Specimen Name: **Specimen**

Sample Name: **PMA 100nM 1h**

| Name                                           | Event Count | % Parent | % Total  | Mean X    | Mean Y    | Median X  | Median Y  |
|------------------------------------------------|-------------|----------|----------|-----------|-----------|-----------|-----------|
| <input checked="" type="checkbox"/> All Events | 50,000      | ---      | 100.000% | 905,933   | 538,000   | 854,538   | 346,476   |
| <input checked="" type="checkbox"/> R1         | 3,771       | 7.542%   | 7.542%   | 1,661,247 | 2,231,362 | 1,506,533 | 1,940,119 |
| <input type="checkbox"/> R2                    | 329         | 8.724%   | 0.658%   | 185,019   | ---       | 24,514    | ---       |

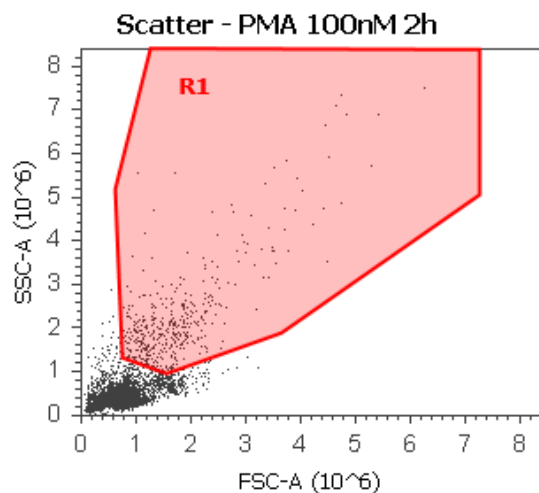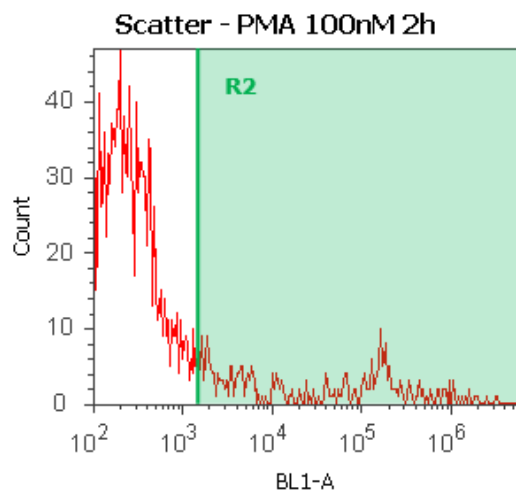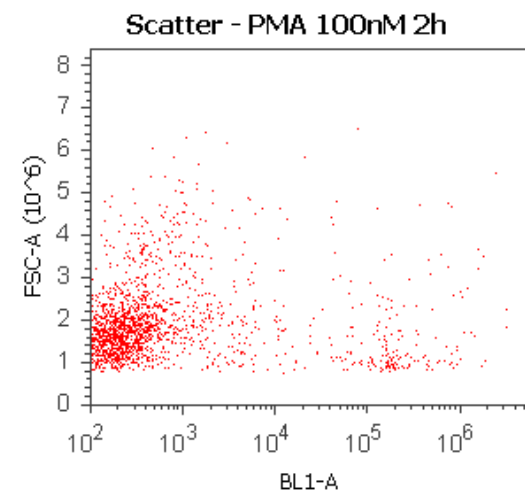

Experiment Name: **02-05-2016 05 00 PM**

Specimen Name: **Specimen**

Sample Name: **PMA 100nM 2h**

| Name                                           | Event Count | % Parent | % Total  | Mean X    | Mean Y    | Median X  | Median Y  |
|------------------------------------------------|-------------|----------|----------|-----------|-----------|-----------|-----------|
| <input checked="" type="checkbox"/> All Events | 50,000      | ---      | 100.000% | 900,733   | 506,602   | 847,541   | 354,843   |
| <input checked="" type="checkbox"/> R1         | 3,066       | 6.132%   | 6.132%   | 1,787,990 | 2,166,540 | 1,635,696 | 1,916,578 |
| <input type="checkbox"/> R2                    | 351         | 11.448%  | 0.702%   | 190,590   | ---       | 41,279    | ---       |

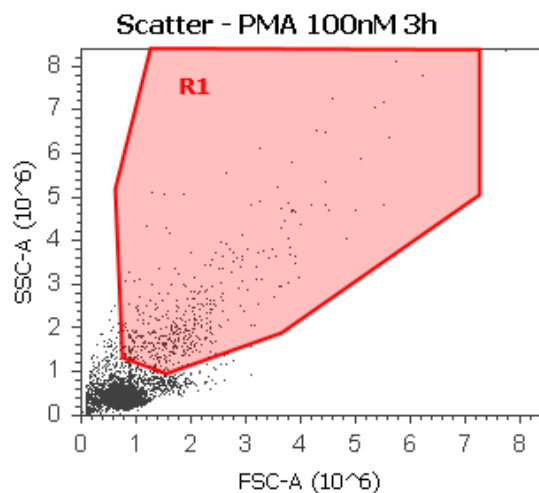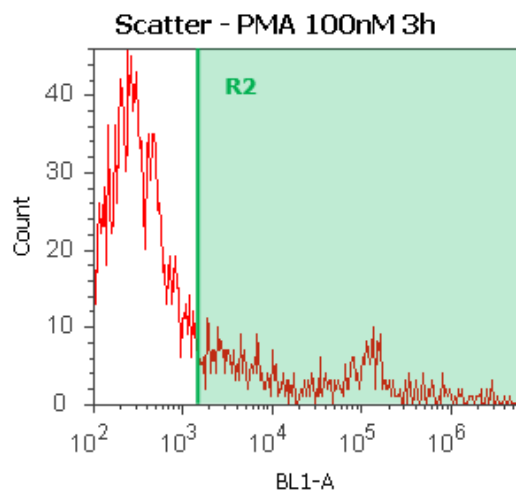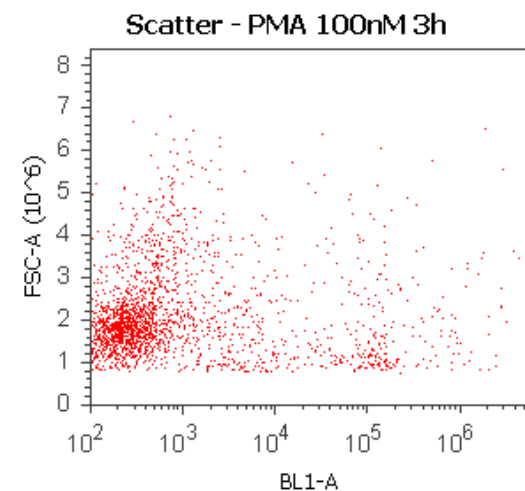

Experiment Name: **02-05-2016 05 00 PM**

Specimen Name: **Specimen**

Sample Name: **PMA 100nM 3h**

| Name                                           | Event Count | % Parent | % Total  | Mean X    | Mean Y    | Median X  | Median Y  |
|------------------------------------------------|-------------|----------|----------|-----------|-----------|-----------|-----------|
| <input checked="" type="checkbox"/> All Events | 50,000      | ---      | 100.000% | 893,284   | 531,432   | 825,921   | 376,185   |
| <input checked="" type="checkbox"/> R1         | 3,052       | 6.104%   | 6.104%   | 2,007,203 | 2,239,429 | 1,788,312 | 1,906,581 |
| <input checked="" type="checkbox"/> R2         | 541         | 17.726%  | 1.082%   | 185,471   | ---       | 17,836    | ---       |



Experiment Name: **02-05-2016 05 00 PM**

Specimen Name: **Specimen**

Sample Name: **PMA 100nM 4h**

|                                     | Name       | Event Count | % Parent | % Total  | Mean X    | Mean Y    | Median X  | Median Y  |
|-------------------------------------|------------|-------------|----------|----------|-----------|-----------|-----------|-----------|
| <input checked="" type="checkbox"/> | All Events | 50,000      | ---      | 100.000% | 923,435   | 624,079   | 806,633   | 408,946   |
| <input checked="" type="checkbox"/> | R1         | 4,535       | 9.070%   | 9.070%   | 2,247,766 | 2,324,354 | 1,918,475 | 1,887,963 |
| <input type="checkbox"/>            | R2         | 1,162       | 25.623%  | 2.324%   | 97,212    | ---       | 5,173     | ---       |





Experiment Name: **02-05-2016 05 00 PM**

Specimen Name: **Specimen**

Sample Name: **control**

| Name                                           | Event Count | % Parent | % Total  | Mean X    | Mean Y    | Median X  | Median Y  |
|------------------------------------------------|-------------|----------|----------|-----------|-----------|-----------|-----------|
| <input checked="" type="checkbox"/> All Events | 50,000      | ---      | 100.000% | 986,776   | 736,766   | 918,684   | 416,180   |
| <input checked="" type="checkbox"/> R1         | 10,033      | 20.066%  | 20.066%  | 1,341,281 | 1,796,886 | 1,154,733 | 1,543,503 |
| <input type="checkbox"/> R2                    | 157         | 1.565%   | 0.314%   | 353,646   | ---       | 75,604    | ---       |

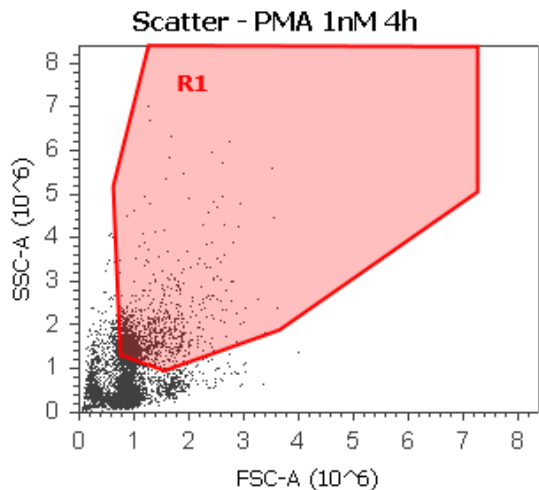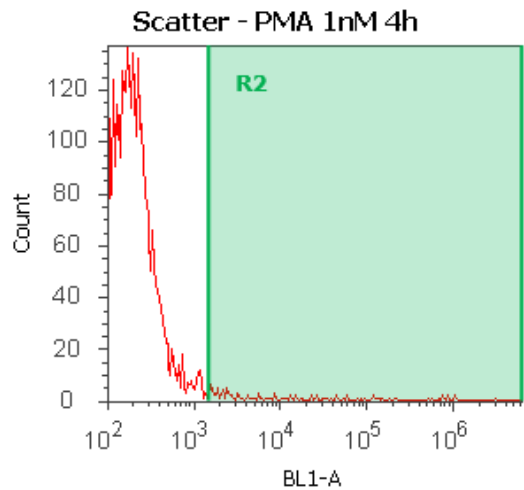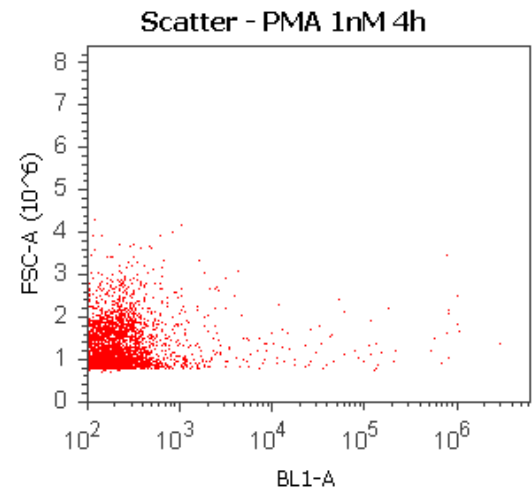

Experiment Name: **02-05-2016 05 00 PM**

Specimen Name: **Specimen**

Sample Name: **PMA 1nM 4h**

| Name                                           | Event Count | % Parent | % Total  | Mean X    | Mean Y    | Median X  | Median Y  |
|------------------------------------------------|-------------|----------|----------|-----------|-----------|-----------|-----------|
| <input checked="" type="checkbox"/> All Events | 50,000      | ---      | 100.000% | 939,136   | 733,131   | 901,220   | 403,678   |
| <input checked="" type="checkbox"/> R1         | 9,850       | 19.700%  | 19.700%  | 1,229,720 | 1,763,264 | 1,047,102 | 1,568,541 |
| <input type="checkbox"/> R2                    | 127         | 1.289%   | 0.254%   | 119,778   | ---       | 6,104     | ---       |

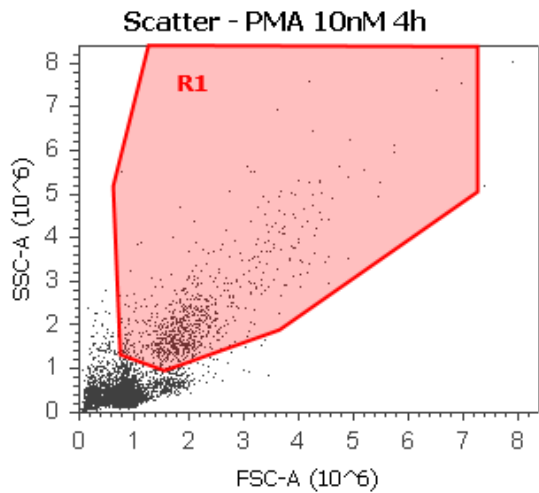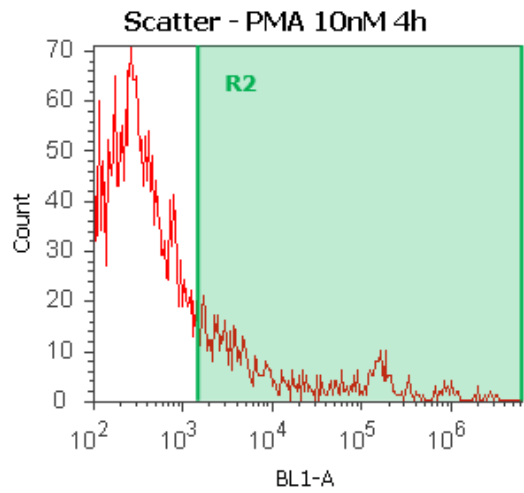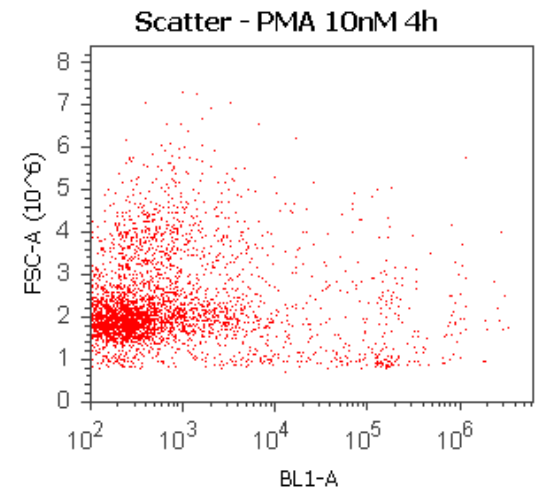

Experiment Name: **02-05-2016 05 00 PM**

Specimen Name: **Specimen**

Sample Name: **PMA 10nM 4h**

| Name                                           | Event Count | % Parent | % Total  | Mean X    | Mean Y    | Median X  | Median Y  |
|------------------------------------------------|-------------|----------|----------|-----------|-----------|-----------|-----------|
| <input checked="" type="checkbox"/> All Events | 50,000      | ---      | 100.000% | 1,006,149 | 611,257   | 886,584   | 350,956   |
| <input checked="" type="checkbox"/> R1         | 5,656       | 11.312%  | 11.312%  | 2,156,124 | 2,257,043 | 1,939,958 | 1,961,659 |
| <input type="checkbox"/> R2                    | 780         | 13.791%  | 1.560%   | 117,391   | ---       | 6,406     | ---       |

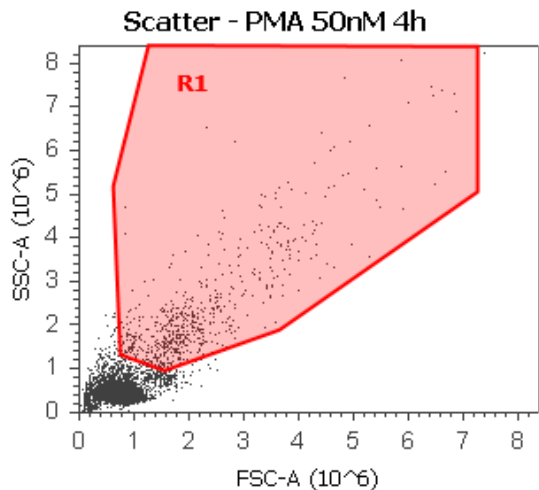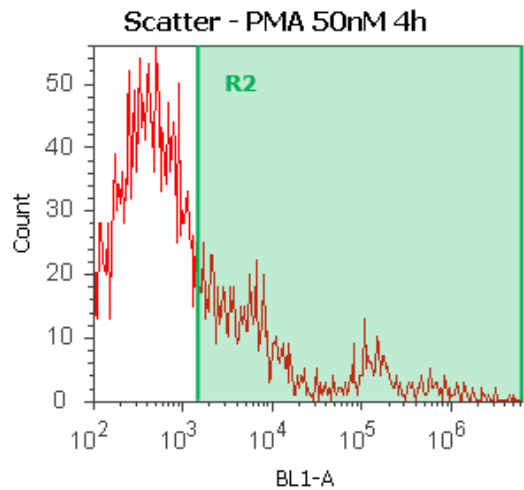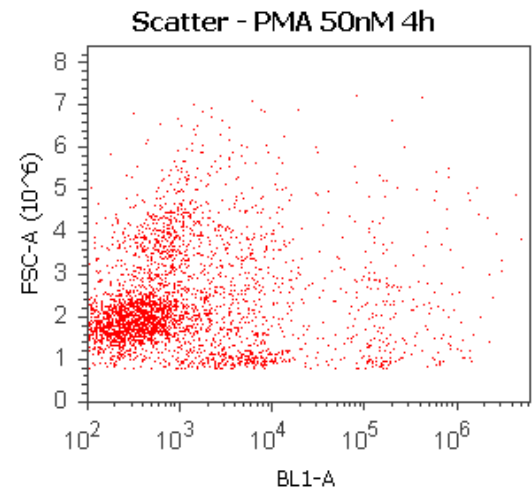

Experiment Name: **02-05-2016 05 00 PM**

Specimen Name: **Specimen**

Sample Name: **PMA 50nM 4h**

| Name                                           | Event Count | % Parent | % Total  | Mean X    | Mean Y    | Median X  | Median Y  |
|------------------------------------------------|-------------|----------|----------|-----------|-----------|-----------|-----------|
| <input checked="" type="checkbox"/> All Events | 50,000      | ---      | 100.000% | 915,957   | 602,935   | 806,487   | 406,815   |
| <input checked="" type="checkbox"/> R1         | 4,226       | 8.452%   | 8.452%   | 2,246,289 | 2,310,722 | 1,951,508 | 1,885,344 |
| <input type="checkbox"/> R2                    | 1,030       | 24.373%  | 2.060%   | 110,854   | ---       | 6,547     | ---       |



Experiment Name: **02-05-2016 05 00 PM**

Specimen Name: **Specimen**

Sample Name: **PMA 100nM 4h**

|                                     | Name       | Event Count | % Parent | % Total  | Mean X    | Mean Y    | Median X  | Median Y  |
|-------------------------------------|------------|-------------|----------|----------|-----------|-----------|-----------|-----------|
| <input checked="" type="checkbox"/> | All Events | 50,000      | ---      | 100.000% | 923,435   | 624,079   | 806,633   | 408,946   |
| <input checked="" type="checkbox"/> | R1         | 4,535       | 9.070%   | 9.070%   | 2,247,766 | 2,324,354 | 1,918,475 | 1,887,963 |
| <input type="checkbox"/>            | R2         | 1,162       | 25.623%  | 2.324%   | 97,212    | ---       | 5,173     | ---       |
