# Supplementary material for: Measurement of NET formation in vitro and in vivo by flow cytometry
Source: PubMed Central journal article supplement — Cytometry A. 2017 Jul 17;91(8):822–9. doi: 10.1002/cyto.a.23169 (PMC5601186; doi:10.1002/cyto.a.23169), 2017-07-17
Supplement: CYTO-91-822-s002.pdf [file CYTO-91-822-s002.pdf]

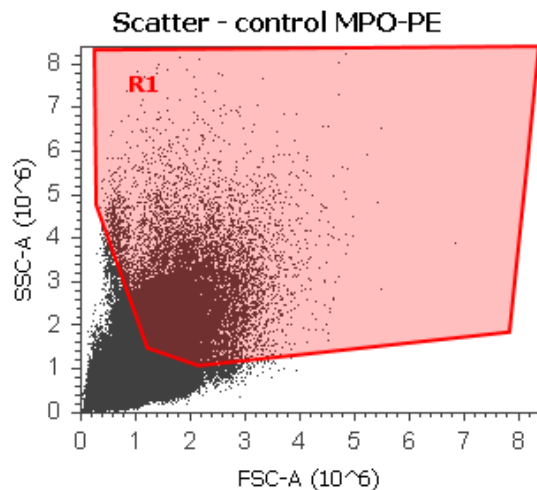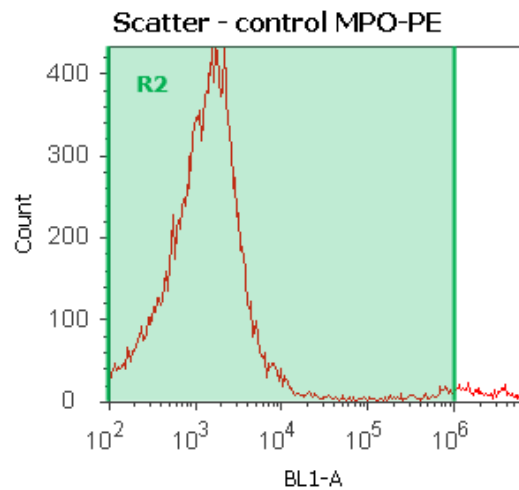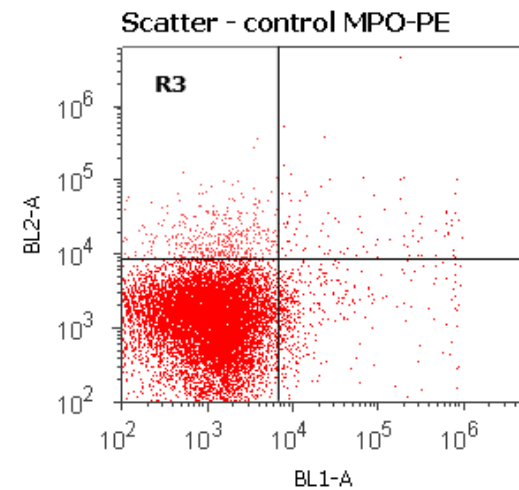

Experiment Name: **02-12-2016 05 28 PM**

Specimen Name: **Specimen**

Sample Name: **control MPO-PE**

| Name                                           | Event Count | % Parent | % Total  |
|------------------------------------------------|-------------|----------|----------|
| <input checked="" type="checkbox"/> All Events | 200,000     | ---      | 100.000% |
| <input checked="" type="checkbox"/> R1         | 29,557      | 14.779%  | 14.779%  |
| <input checked="" type="checkbox"/> R2         | 19,375      | 65.551%  | 9.688%   |
| <input type="checkbox"/> R3                    | 411         | 2.121%   | 0.206%   |
| <input type="checkbox"/> R4                    | 94          | 0.485%   | 0.047%   |
| <input type="checkbox"/> R5                    | 17,967      | 92.733%  | 8.984%   |
| <input type="checkbox"/> R6                    | 903         | 4.661%   | 0.452%   |

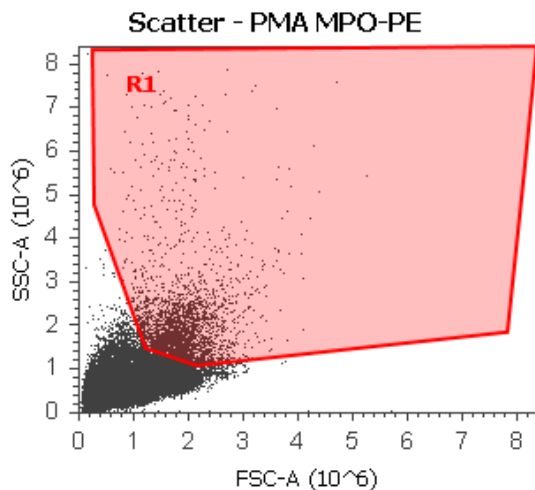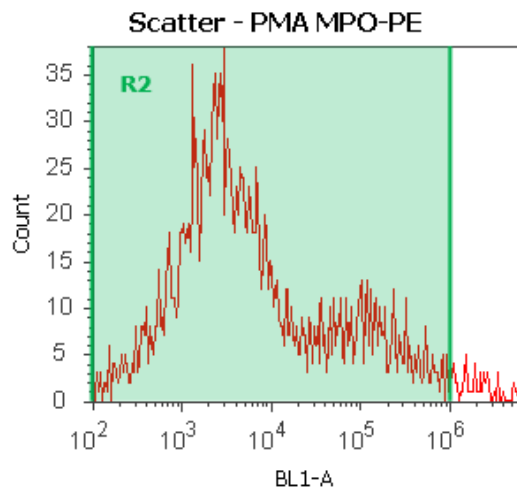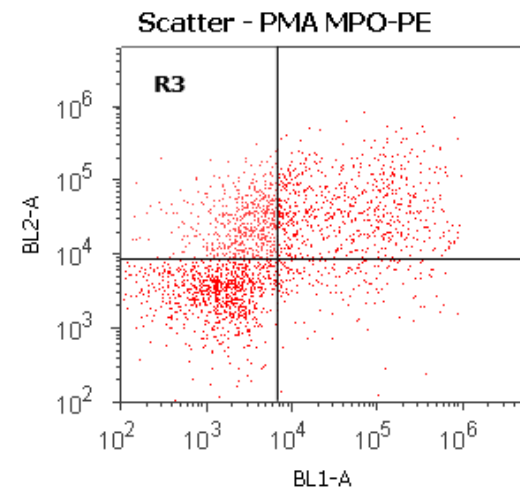

Experiment Name: **02-12-2016 05 28 PM**

Specimen Name: **Specimen**

Sample Name: **PMA MPO-PE**

| Name                                           | Event Count | % Parent | % Total  |
|------------------------------------------------|-------------|----------|----------|
| <input checked="" type="checkbox"/> All Events | 200,000     | ---      | 100.000% |
| <input checked="" type="checkbox"/> R1         | 2,868       | 1.434%   | 1.434%   |
| <input checked="" type="checkbox"/> R2         | 2,266       | 79.010%  | 1.133%   |
| <input type="checkbox"/> R3                    | 508         | 22.418%  | 0.254%   |
| <input type="checkbox"/> R4                    | 655         | 28.906%  | 0.328%   |
| <input type="checkbox"/> R5                    | 897         | 39.585%  | 0.449%   |
| <input type="checkbox"/> R6                    | 206         | 9.091%   | 0.103%   |
