# Supplementary material for: Measurement of NET formation in vitro and in vivo by flow cytometry
Source: PubMed Central journal article supplement — Cytometry A. 2017 Jul 17;91(8):822–9. doi: 10.1002/cyto.a.23169 (PMC5601186; doi:10.1002/cyto.a.23169), 2017-07-17
Supplement: CYTO-91-822-s003.pdf [file CYTO-91-822-s003.pdf]

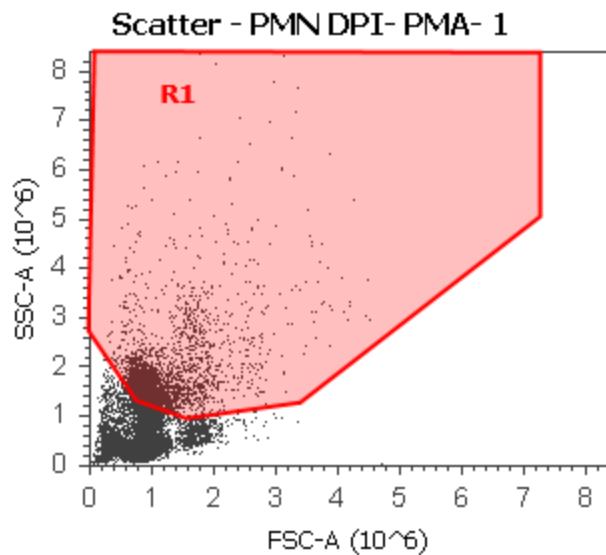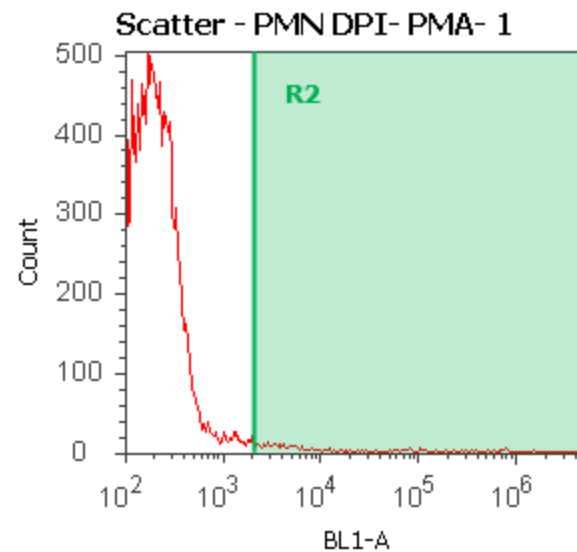

Experiment Name: **07-04-2016 05 00 PM(9)**

Specimen Name: **Specimen**

Sample Name: **PMN DPI- PMA- 1**

| Name                                           | Event Count | % Parent | % Total  | Mean X    | Mean Y    | Median X | Median Y  |
|------------------------------------------------|-------------|----------|----------|-----------|-----------|----------|-----------|
| <input checked="" type="checkbox"/> All Events | 100,000     | ---      | 100.000% | 980,822   | 846,688   | 935,305  | 537,442   |
| <input checked="" type="checkbox"/> R1         | 28,664      | 28.664%  | 28.664%  | 1,144,129 | 1,732,219 | 972,243  | 1,535,537 |
| <input type="checkbox"/> R2                    | 413         | 1.441%   | 0.413%   | 95,021    | ---       | 6,005    | ---       |

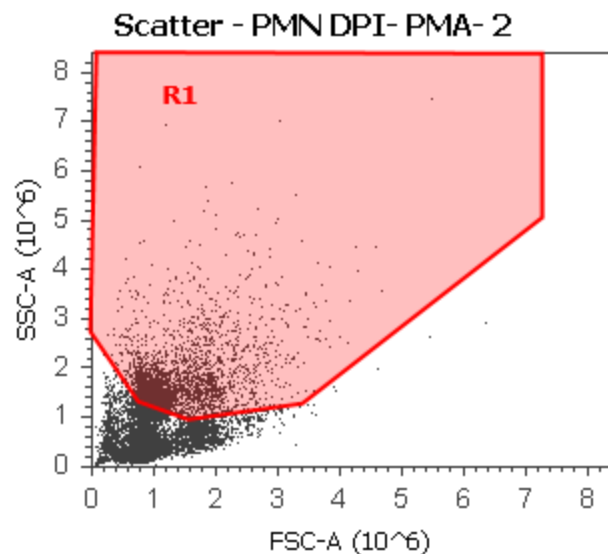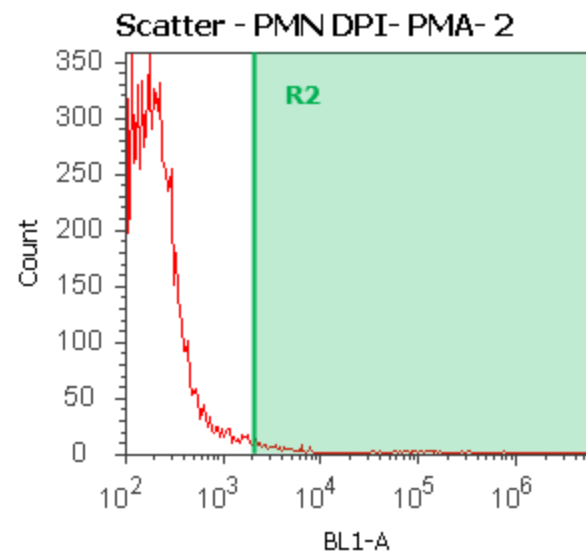

Experiment Name: **07-04-2016 05 00 PM(9)**

Specimen Name: **Specimen**

Sample Name: **PMN DPI- PMA- 2**

| Name                                           | Event Count | % Parent | % Total  | Mean X    | Mean Y    | Median X  | Median Y  |
|------------------------------------------------|-------------|----------|----------|-----------|-----------|-----------|-----------|
| <input checked="" type="checkbox"/> All Events | 100,000     | ---      | 100.000% | 1,064,491 | 729,709   | 963,983   | 437,209   |
| <input checked="" type="checkbox"/> R1         | 22,583      | 22.583%  | 22.583%  | 1,341,180 | 1,684,265 | 1,105,299 | 1,521,225 |
| <input type="checkbox"/> R2                    | 253         | 1.120%   | 0.253%   | 75,041    | ---       | 5,504     | ---       |

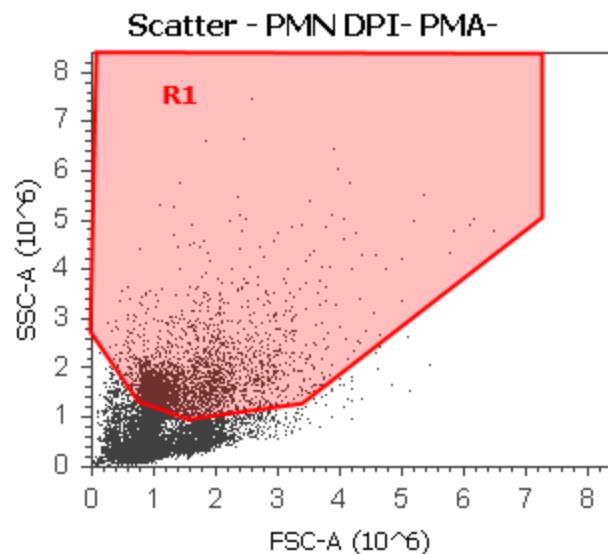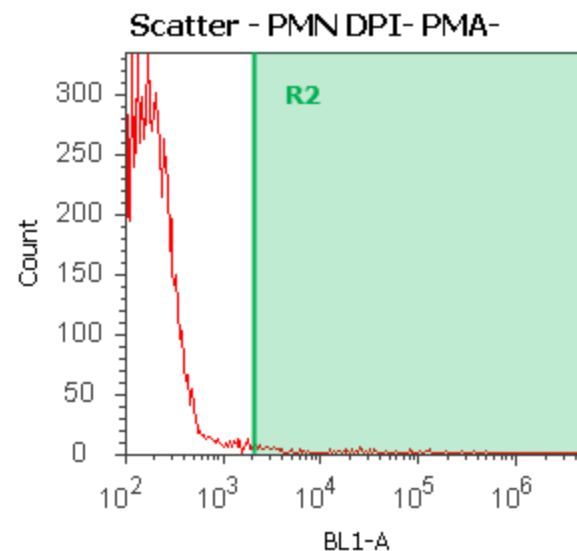

Experiment Name: **07-12-2016 05 00 PM(10)**

Specimen Name: **Specimen**

Sample Name: **PMN DPI- PMA-**

| Name                                           | Event Count | % Parent | % Total  | Mean X    | Mean Y    | Median X  | Median Y  |
|------------------------------------------------|-------------|----------|----------|-----------|-----------|-----------|-----------|
| <input checked="" type="checkbox"/> All Events | 100,000     | ---      | 100.000% | 1,147,159 | 731,085   | 995,497   | 430,148   |
| <input checked="" type="checkbox"/> R1         | 22,524      | 22.524%  | 22.524%  | 1,547,852 | 1,736,942 | 1,276,011 | 1,547,405 |
| <input checked="" type="checkbox"/> R2         | 195         | 0.866%   | 0.195%   | 74,739    | ---       | 13,072    | ---       |

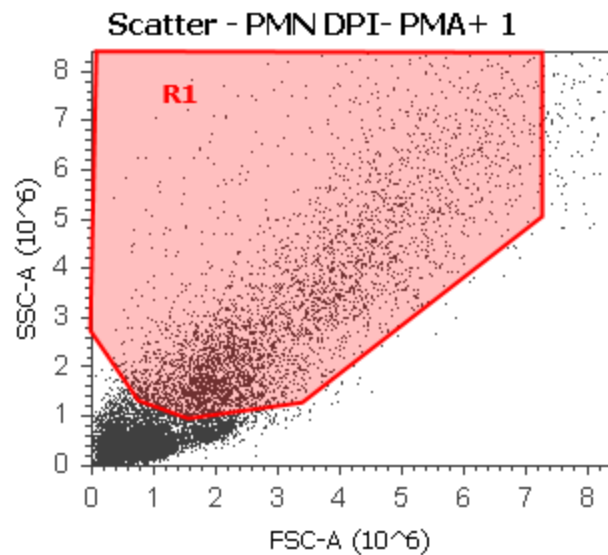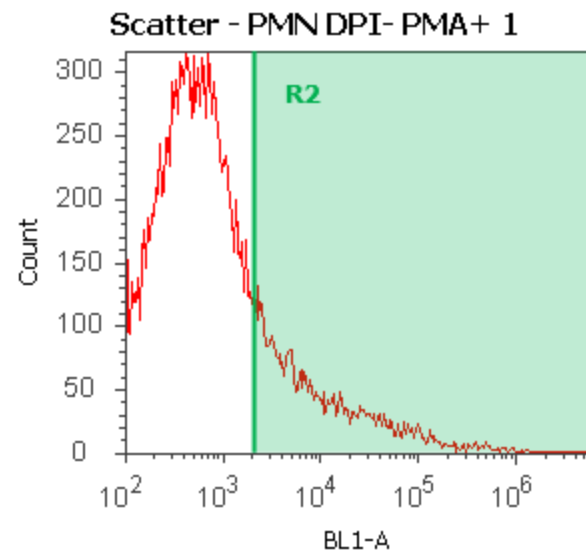

Experiment Name: **07-04-2016 05 00 PM(9)**

Specimen Name: **Specimen**

Sample Name: **PMN DPI- PMA+ 1**

| Name                                           | Event Count | % Parent | % Total  | Mean X    | Mean Y    | Median X  | Median Y  |
|------------------------------------------------|-------------|----------|----------|-----------|-----------|-----------|-----------|
| <input checked="" type="checkbox"/> All Events | 100,000     | ---      | 100.000% | 1,817,297 | 1,637,008 | 1,032,679 | 528,321   |
| <input checked="" type="checkbox"/> R1         | 26,566      | 26.566%  | 26.566%  | 3,043,645 | 3,118,905 | 2,634,383 | 2,548,022 |
| <input checked="" type="checkbox"/> R2         | 4,474       | 16.841%  | 4.474%   | 37,213    | ---       | 7,024     | ---       |

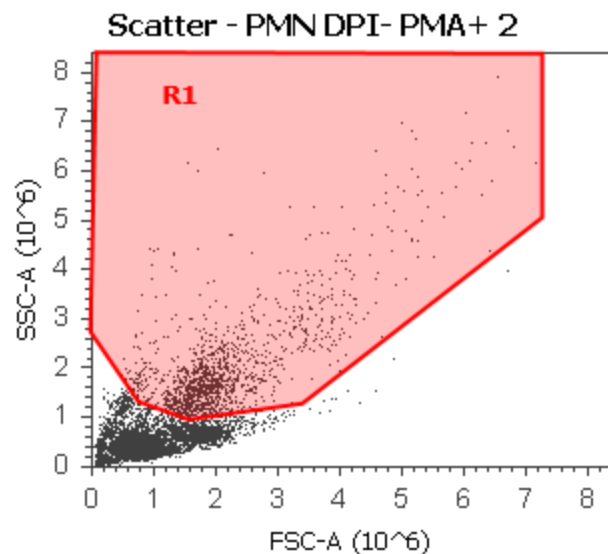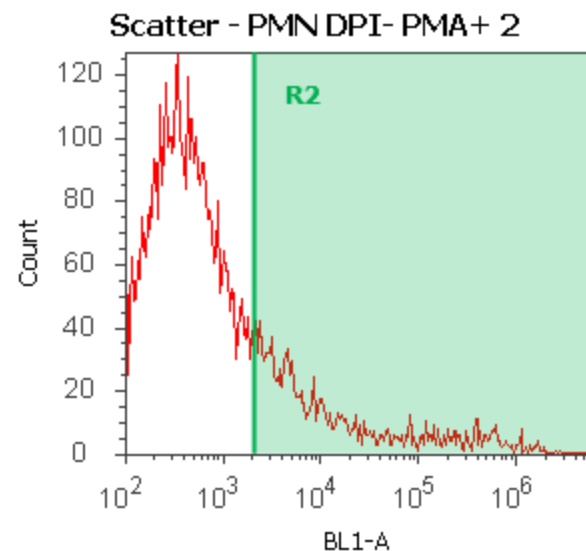

Experiment Name: **07-04-2016 05 00 PM(9)**

Specimen Name: **Specimen**

Sample Name: **PMN DPI- PMA+ 2**

| Name                                           | Event Count | % Parent | % Total  | Mean X    | Mean Y    | Median X  | Median Y  |
|------------------------------------------------|-------------|----------|----------|-----------|-----------|-----------|-----------|
| <input checked="" type="checkbox"/> All Events | 100,000     | ---      | 100.000% | 1,053,141 | 535,799   | 889,388   | 337,535   |
| <input checked="" type="checkbox"/> R1         | 9,572       | 9.572%   | 9.572%   | 2,155,102 | 1,997,202 | 1,916,656 | 1,698,543 |
| <input checked="" type="checkbox"/> R2         | 1,579       | 16.496%  | 1.579%   | 107,978   | ---       | 7,824     | ---       |

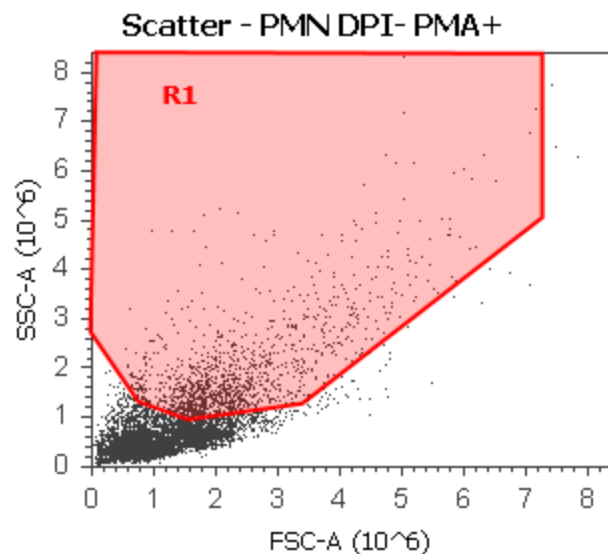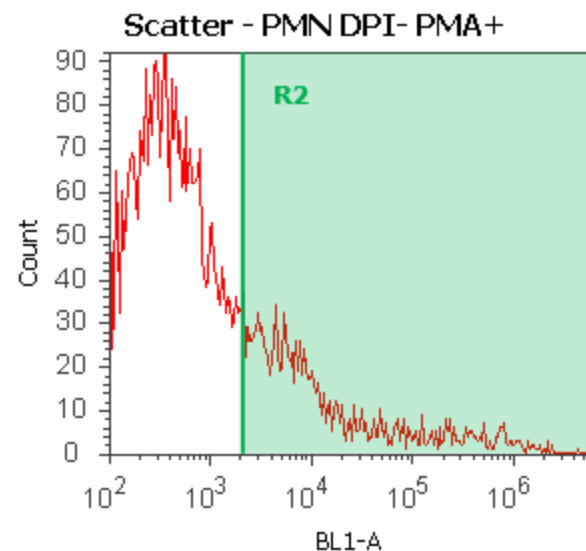

Experiment Name: **07-12-2016 05 00 PM(10)**

Specimen Name: **Specimen**

Sample Name: **PMN DPI- PMA+**

| Name                                           | Event Count | % Parent | % Total  | Mean X    | Mean Y    | Median X  | Median Y  |
|------------------------------------------------|-------------|----------|----------|-----------|-----------|-----------|-----------|
| <input checked="" type="checkbox"/> All Events | 100,000     | ---      | 100.000% | 1,130,649 | 545,034   | 922,526   | 353,558   |
| <input checked="" type="checkbox"/> R1         | 9,188       | 9.188%   | 9.188%   | 2,329,925 | 1,903,940 | 2,056,581 | 1,578,668 |
| <input checked="" type="checkbox"/> R2         | 1,514       | 16.478%  | 1.514%   | 99,866    | ---       | 7,794     | ---       |

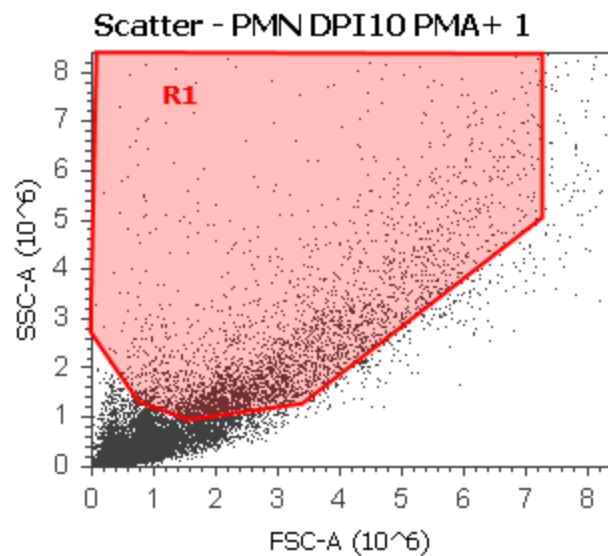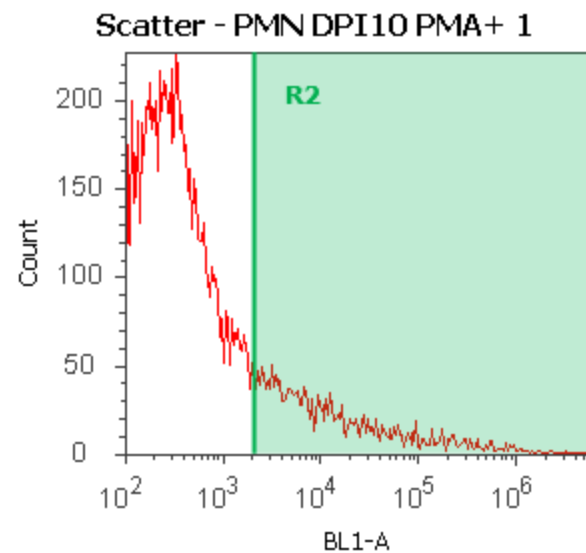

Experiment Name: **07-04-2016 05 00 PM(9)**

Specimen Name: **Specimen**

Sample Name: **PMN DPI10 PMA+ 1**

| Name                                           | Event Count | % Parent | % Total  | Mean X    | Mean Y    | Median X  | Median Y  |
|------------------------------------------------|-------------|----------|----------|-----------|-----------|-----------|-----------|
| <input checked="" type="checkbox"/> All Events | 100,000     | ---      | 100.000% | 1,613,696 | 1,040,872 | 1,041,087 | 440,514   |
| <input checked="" type="checkbox"/> R1         | 21,326      | 21.326%  | 21.326%  | 3,073,665 | 2,520,850 | 2,784,463 | 1,981,581 |
| <input checked="" type="checkbox"/> R2         | 2,396       | 11.235%  | 2.396%   | 65,498    | ---       | 9,205     | ---       |

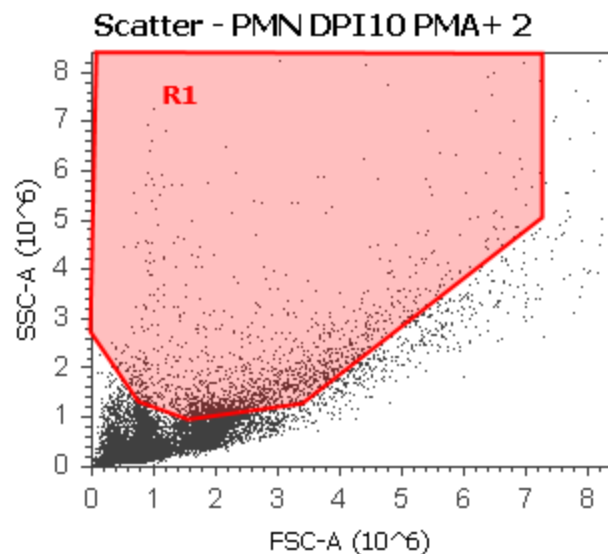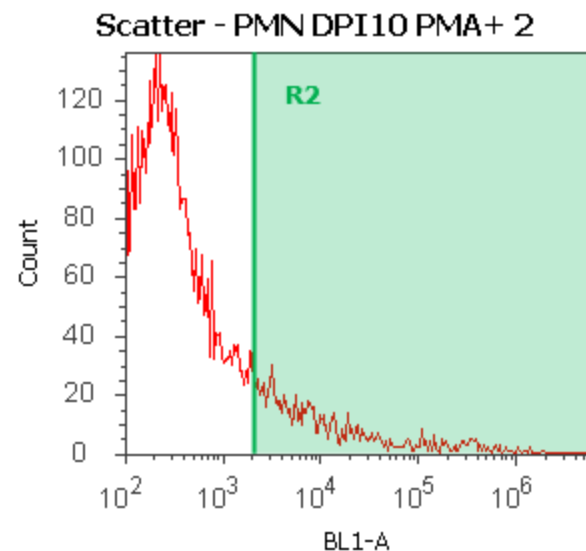

Experiment Name: **07-04-2016 05 00 PM(9)**

Specimen Name: **Specimen**

Sample Name: **PMN DPI10 PMA+ 2**

| Name                                           | Event Count | % Parent | % Total  | Mean X    | Mean Y    | Median X  | Median Y  |
|------------------------------------------------|-------------|----------|----------|-----------|-----------|-----------|-----------|
| <input checked="" type="checkbox"/> All Events | 100,000     | ---      | 100.000% | 1,369,996 | 660,614   | 980,628   | 356,412   |
| <input checked="" type="checkbox"/> R1         | 11,022      | 11.022%  | 11.022%  | 2,675,992 | 2,031,143 | 2,435,592 | 1,651,072 |
| <input checked="" type="checkbox"/> R2         | 1,058       | 9.599%   | 1.058%   | 62,758    | ---       | 7,548     | ---       |



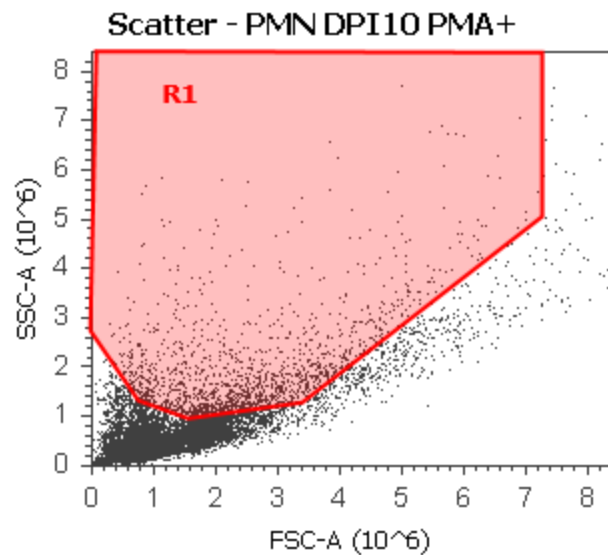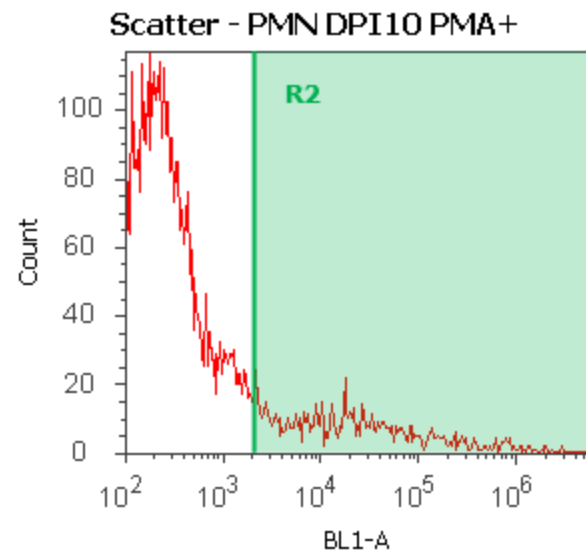

Experiment Name: **07-12-2016 05 00 PM(10)**

Specimen Name: **Specimen**

Sample Name: **PMN DPI10 PMA+**

| Name                                           | Event Count | % Parent | % Total  | Mean X    | Mean Y    | Median X  | Median Y  |
|------------------------------------------------|-------------|----------|----------|-----------|-----------|-----------|-----------|
| <input checked="" type="checkbox"/> All Events | 100,000     | ---      | 100.000% | 1,383,625 | 666,667   | 983,148   | 381,344   |
| <input checked="" type="checkbox"/> R1         | 10,782      | 10.782%  | 10.782%  | 2,444,292 | 1,938,107 | 2,250,389 | 1,621,501 |
| <input checked="" type="checkbox"/> R2         | 954         | 8.848%   | 0.954%   | 108,585   | ---       | 18,486    | ---       |
