# Supplementary material for: Measurement of NET formation in vitro and in vivo by flow cytometry
Source: PubMed Central journal article supplement — Cytometry A. 2017 Jul 17;91(8):822–9. doi: 10.1002/cyto.a.23169 (PMC5601186; doi:10.1002/cyto.a.23169), 2017-07-17
Supplement: CYTO-91-822-s004.pdf [file CYTO-91-822-s004.pdf]

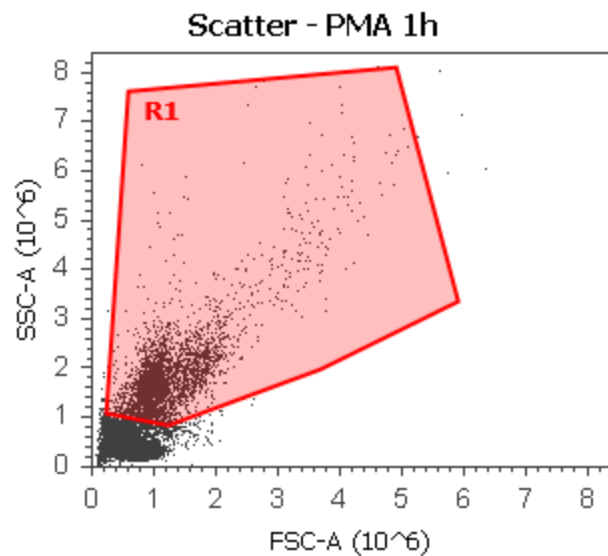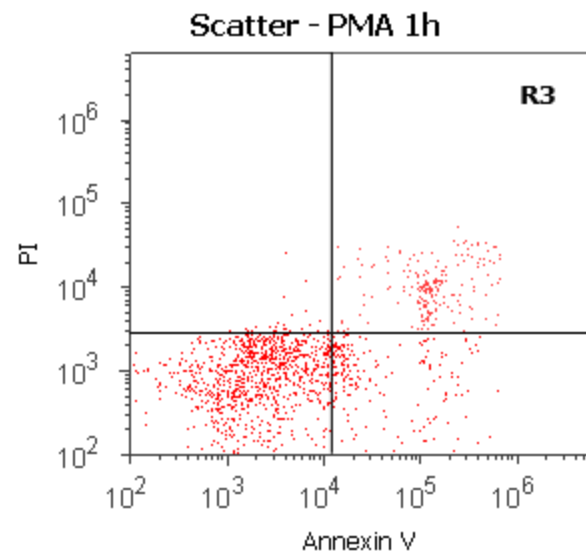

Experiment Name: **08-06-2015 06 39**

Specimen Name: **Specimen**

Sample Name: **PMA 1h**

| Name                                           | Event Count | % Parent | % Total  |
|------------------------------------------------|-------------|----------|----------|
| <input checked="" type="checkbox"/> All Events | 20,000      | ---      | 100.000% |
| <input checked="" type="checkbox"/> <b>R1</b>  | 3,293       | 16.465%  | 16.465%  |
| <input type="checkbox"/> R2                    | 27          | 0.820%   | 0.135%   |
| <input type="checkbox"/> R3                    | 206         | 6.256%   | 1.030%   |
| <input type="checkbox"/> R4                    | 1,149       | 34.892%  | 5.745%   |
| <input type="checkbox"/> R5                    | 1,911       | 58.032%  | 9.555%   |

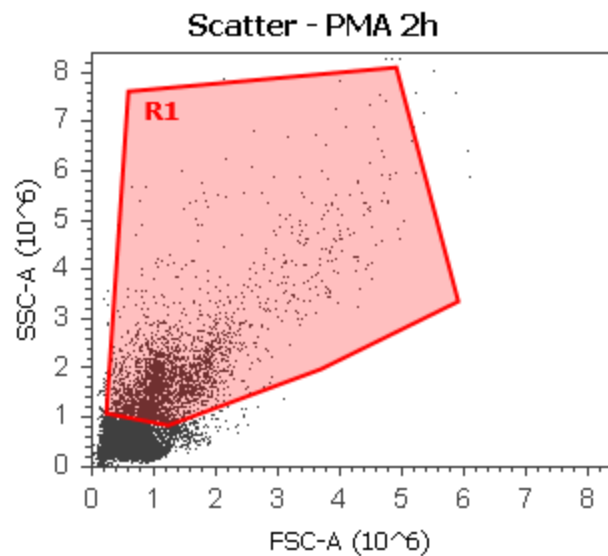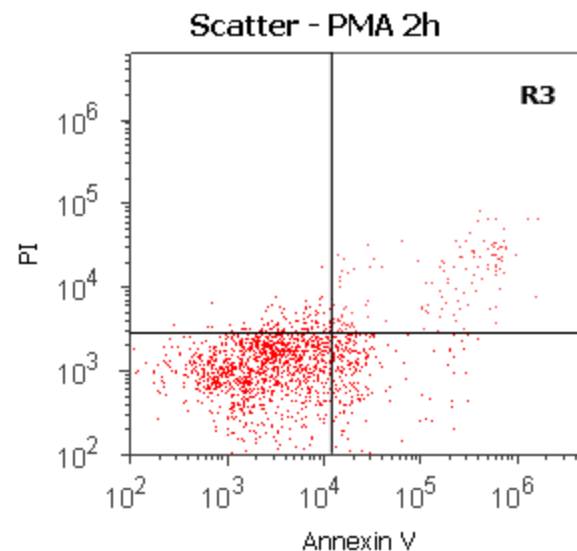

Experiment Name: **08-06-2015 06 39**

Specimen Name: **Specimen**

Sample Name: **PMA 2h**

| Name                                           | Event Count | % Parent | % Total  |
|------------------------------------------------|-------------|----------|----------|
| <input checked="" type="checkbox"/> All Events | 20,000      | ---      | 100.000% |
| <input checked="" type="checkbox"/> R1         | 2,832       | 14.160%  | 14.160%  |
| <input type="checkbox"/> R2                    | 102         | 3.602%   | 0.510%   |
| <input type="checkbox"/> R3                    | 133         | 4.696%   | 0.665%   |
| <input type="checkbox"/> R4                    | 1,350       | 47.669%  | 6.750%   |
| <input type="checkbox"/> R5                    | 1,247       | 44.032%  | 6.235%   |

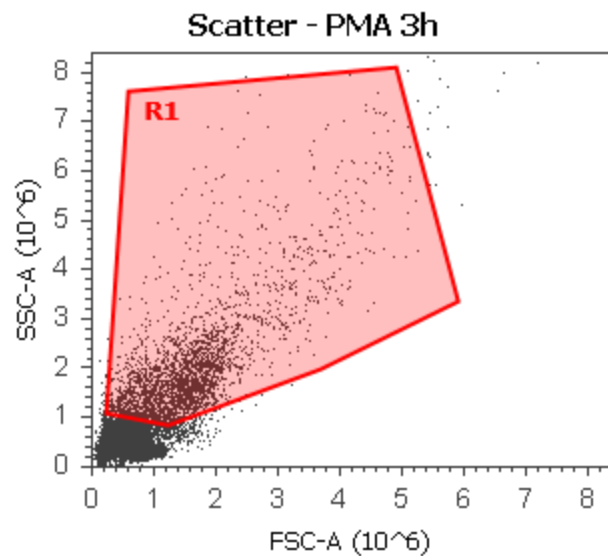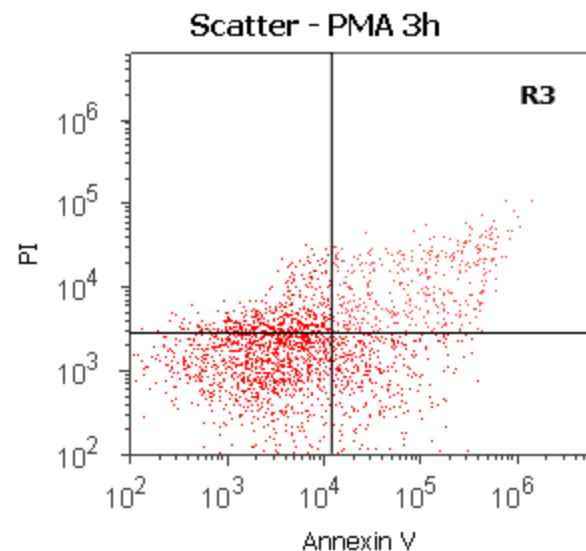

Experiment Name: **08-06-2015 06 39**

Specimen Name: **Specimen**

Sample Name: **PMA 3h**

| Name                                           | Event Count | % Parent | % Total  |
|------------------------------------------------|-------------|----------|----------|
| <input checked="" type="checkbox"/> All Events | 20,000      | ---      | 100.000% |
| <input checked="" type="checkbox"/> <b>R1</b>  | 2,864       | 14.320%  | 14.320%  |
| <input type="checkbox"/> R2                    | 423         | 14.770%  | 2.115%   |
| <input type="checkbox"/> R3                    | 406         | 14.176%  | 2.030%   |
| <input type="checkbox"/> R4                    | 1,209       | 42.214%  | 6.045%   |
| <input type="checkbox"/> R5                    | 826         | 28.841%  | 4.130%   |

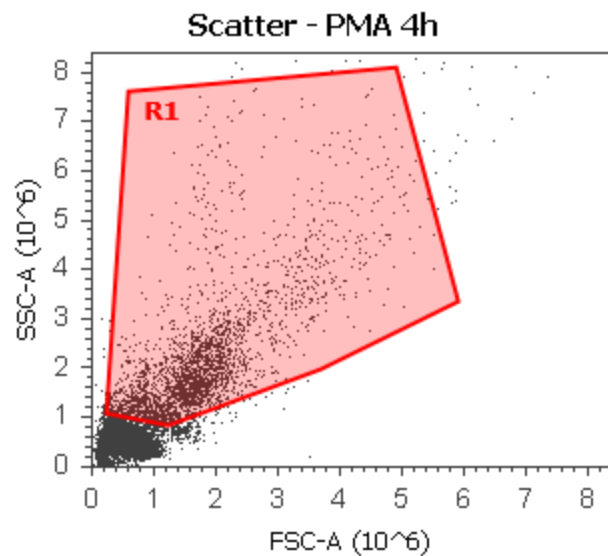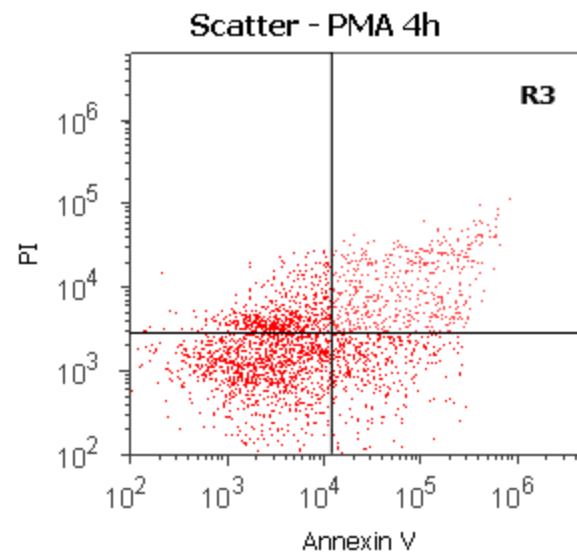

Experiment Name: **08-06-2015 06 39**

Specimen Name: **Specimen**

Sample Name: **PMA 4h**

| Name                                           | Event Count | % Parent | % Total  |
|------------------------------------------------|-------------|----------|----------|
| <input checked="" type="checkbox"/> All Events | 20,000      | ---      | 100.000% |
| <input checked="" type="checkbox"/> R1         | 2,830       | 14.150%  | 14.150%  |
| <input type="checkbox"/> R2                    | 533         | 18.834%  | 2.665%   |
| <input type="checkbox"/> R3                    | 508         | 17.951%  | 2.540%   |
| <input type="checkbox"/> R4                    | 1,261       | 44.558%  | 6.305%   |
| <input type="checkbox"/> R5                    | 528         | 18.657%  | 2.640%   |

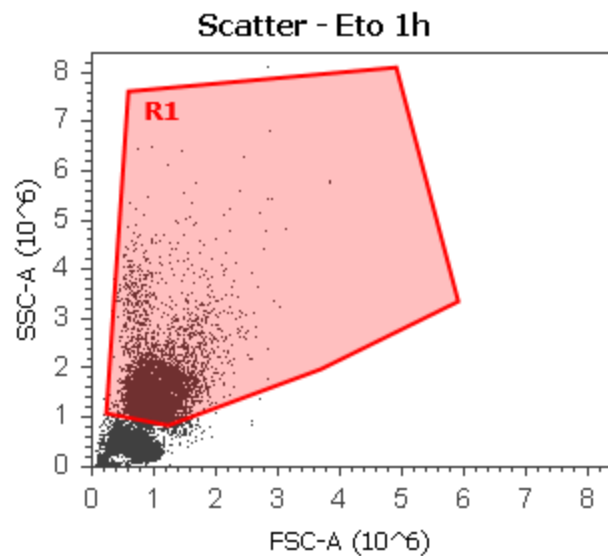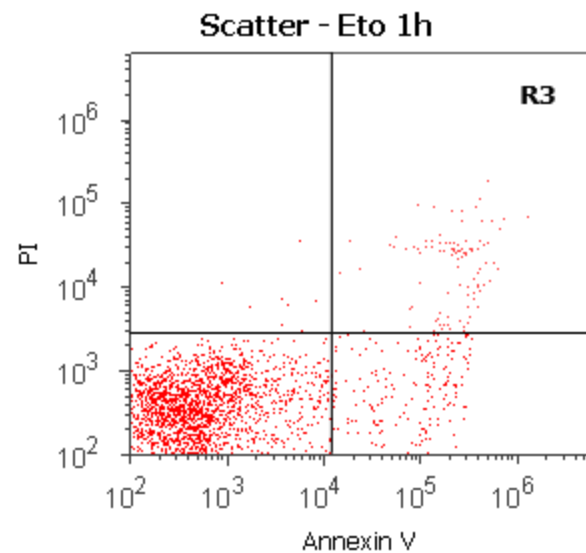

Experiment Name: **08-06-2015 06 39**

Specimen Name: **Specimen**

Sample Name: **Eto 1h**

| Name                                           | Event Count | % Parent | % Total  |
|------------------------------------------------|-------------|----------|----------|
| <input checked="" type="checkbox"/> All Events | 20,000      | ---      | 100.000% |
| <input checked="" type="checkbox"/> R1         | 8,184       | 40.920%  | 40.920%  |
| <input type="checkbox"/> R2                    | 8           | 0.098%   | 0.040%   |
| <input type="checkbox"/> R3                    | 101         | 1.234%   | 0.505%   |
| <input type="checkbox"/> R4                    | 6,236       | 76.197%  | 31.180%  |
| <input type="checkbox"/> R5                    | 1,839       | 22.471%  | 9.195%   |

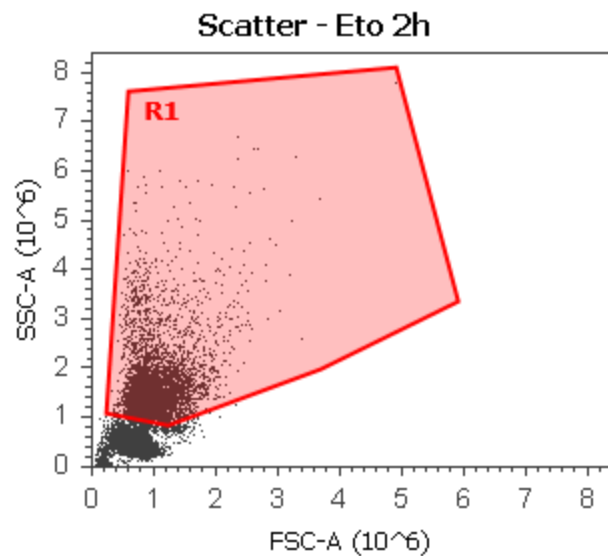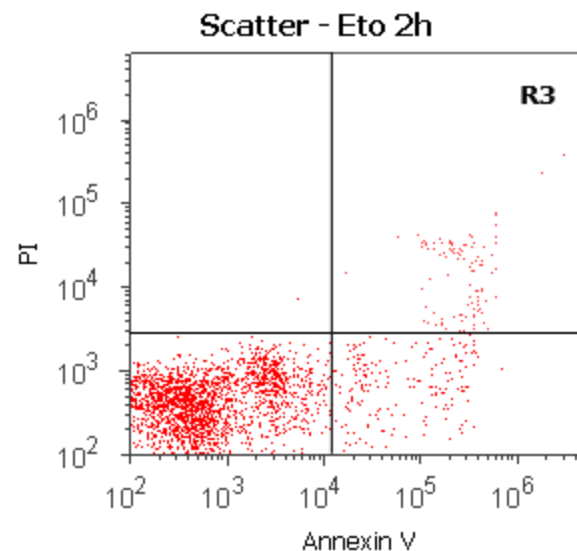

Experiment Name: **08-06-2015 06 39**

Specimen Name: **Specimen**

Sample Name: **Eto 2h**

| Name                                           | Event Count | % Parent | % Total  |
|------------------------------------------------|-------------|----------|----------|
| <input checked="" type="checkbox"/> All Events | 20,000      | ---      | 100.000% |
| <input checked="" type="checkbox"/> <b>R1</b>  | 6,817       | 34.085%  | 34.085%  |
| <input type="checkbox"/> R2                    | 2           | 0.029%   | 0.010%   |
| <input type="checkbox"/> R3                    | 101         | 1.482%   | 0.505%   |
| <input type="checkbox"/> R4                    | 5,232       | 76.749%  | 26.160%  |
| <input type="checkbox"/> R5                    | 1,482       | 21.740%  | 7.410%   |

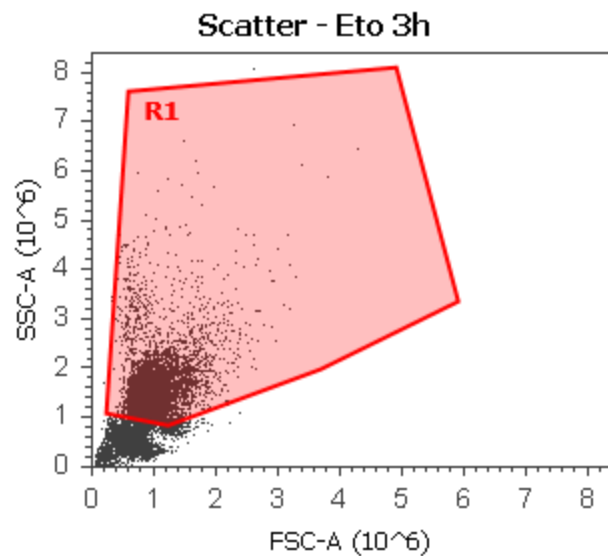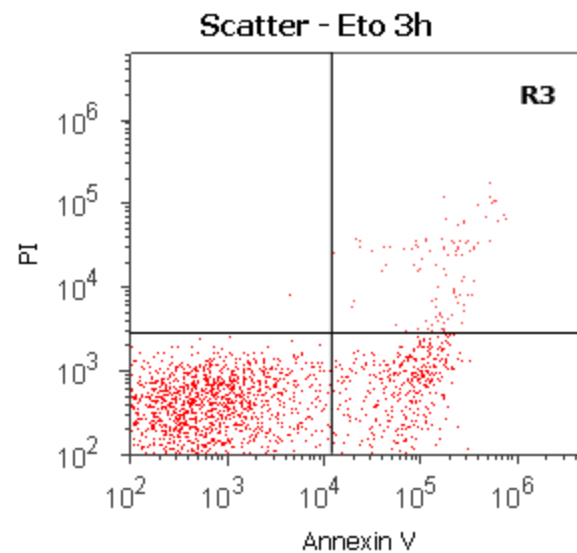

Experiment Name: **08-06-2015 06 39**

Specimen Name: **Specimen**

Sample Name: **Eto 3h**

| Name                                           | Event Count | % Parent | % Total  |
|------------------------------------------------|-------------|----------|----------|
| <input checked="" type="checkbox"/> All Events | 20,000      | ---      | 100.000% |
| <input checked="" type="checkbox"/> <b>R1</b>  | 6,624       | 33.120%  | 33.120%  |
| <input type="checkbox"/> R2                    | 2           | 0.030%   | 0.010%   |
| <input type="checkbox"/> R3                    | 99          | 1.495%   | 0.495%   |
| <input type="checkbox"/> R4                    | 3,713       | 56.054%  | 18.565%  |
| <input type="checkbox"/> R5                    | 2,810       | 42.421%  | 14.050%  |

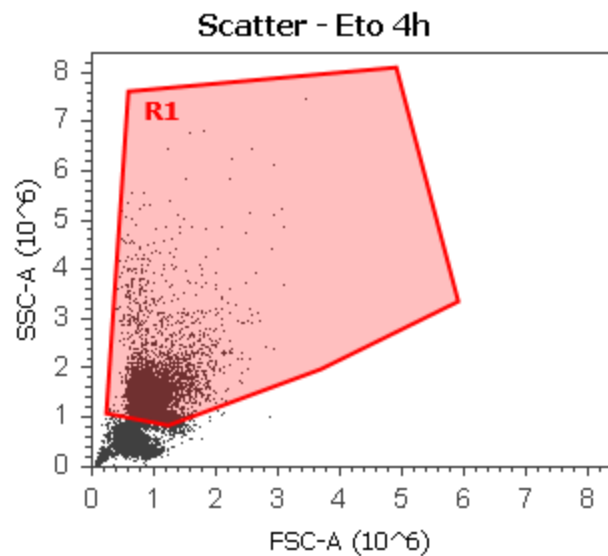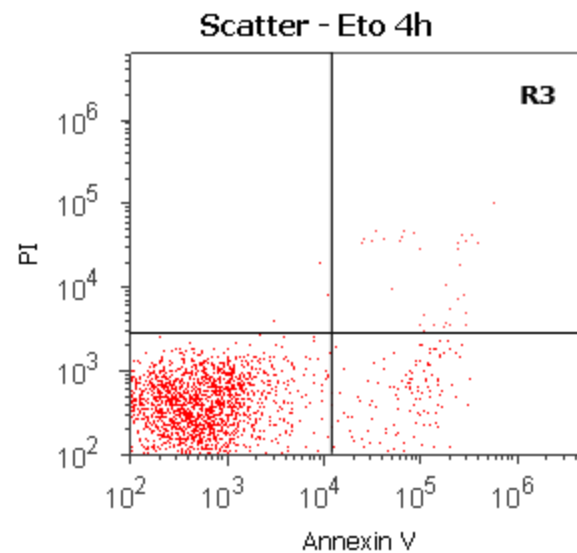

Experiment Name: **08-06-2015 06 39**

Specimen Name: **Specimen**

Sample Name: **Eto 4h**

| Name                                           | Event Count | % Parent | % Total  |
|------------------------------------------------|-------------|----------|----------|
| <input checked="" type="checkbox"/> All Events | 20,000      | ---      | 100.000% |
| <input checked="" type="checkbox"/> <b>R1</b>  | 6,062       | 30.310%  | 30.310%  |
| <input type="checkbox"/> R2                    | 3           | 0.049%   | 0.015%   |
| <input type="checkbox"/> R3                    | 32          | 0.528%   | 0.160%   |
| <input type="checkbox"/> R4                    | 4,322       | 71.297%  | 21.610%  |
| <input type="checkbox"/> R5                    | 1,705       | 28.126%  | 8.525%   |



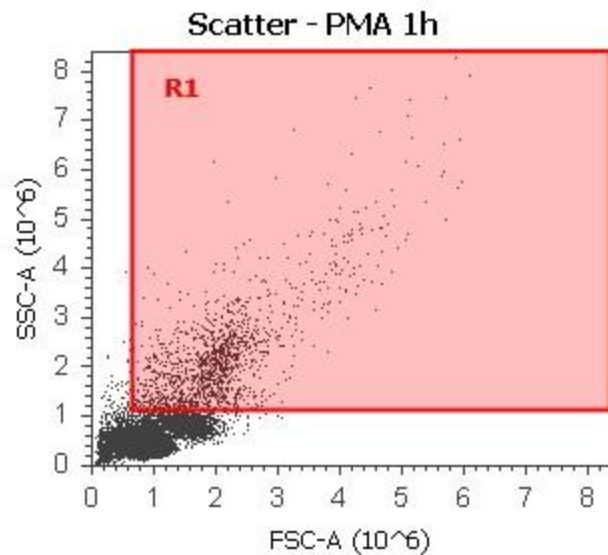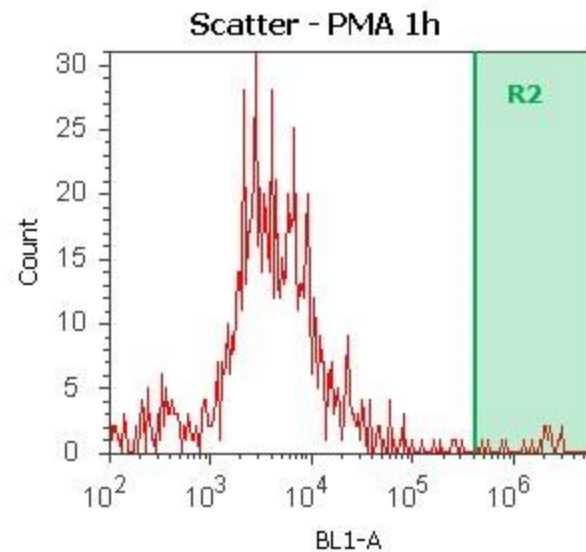

Experiment Name: **07-13-2015 05 00 PM**

Specimen Name: **Specimen**

Sample Name: **PMA 1h**

| Name                                           | Event Count | % Parent | % Total  | Mean X    | Mean Y    | Median X  | Median Y  |
|------------------------------------------------|-------------|----------|----------|-----------|-----------|-----------|-----------|
| <input checked="" type="checkbox"/> All Events | 20,000      | ---      | 100.000% | 966,689   | 573,269   | 866,995   | 414,435   |
| <input checked="" type="checkbox"/> R1         | 1,434       | 7.170%   | 7.170%   | 2,100,373 | 2,198,355 | 2,012,080 | 2,001,470 |
| <input type="checkbox"/> R                     | 21          | 1.464%   | 0.105%   | 1,896,293 | ---       | 2,053,040 | ---       |

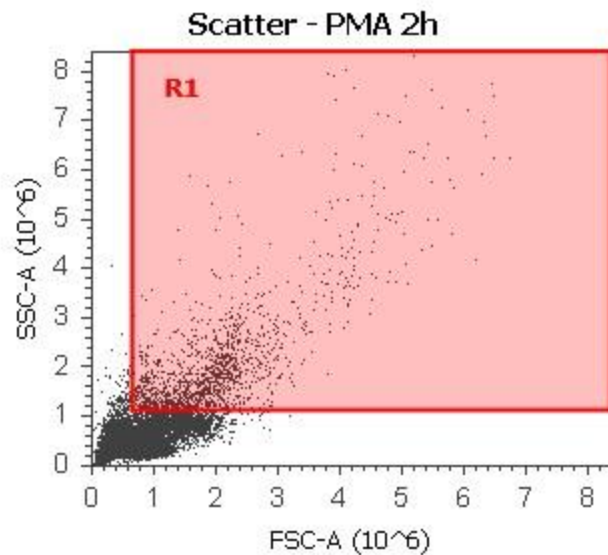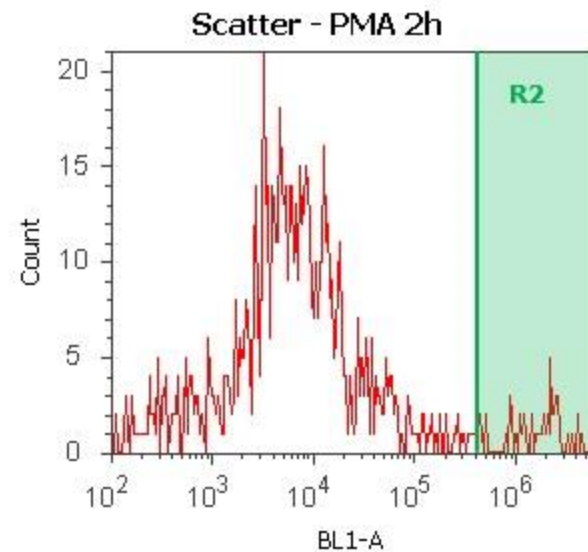

Experiment Name: **07-13-2015 05 00 PM**

Specimen Name: **Specimen**

Sample Name: **PMA 2h**

| Name                                           | Event Count | % Parent | % Total  | Mean X    | Mean Y    | Median X  | Median Y  |
|------------------------------------------------|-------------|----------|----------|-----------|-----------|-----------|-----------|
| <input checked="" type="checkbox"/> All Events | 20,000      | ---      | 100.000% | 926,233   | 588,622   | 821,214   | 430,292   |
| <input checked="" type="checkbox"/> R1         | 1,429       | 7.145%   | 7.145%   | 2,068,334 | 2,104,695 | 1,938,125 | 1,743,202 |
| <input type="checkbox"/> R                     | 55          | 3.849%   | 0.275%   | 1,922,488 | ---       | 1,883,376 | ---       |

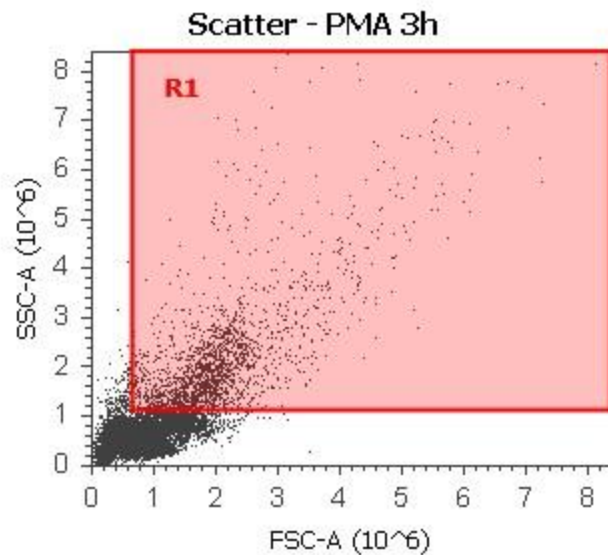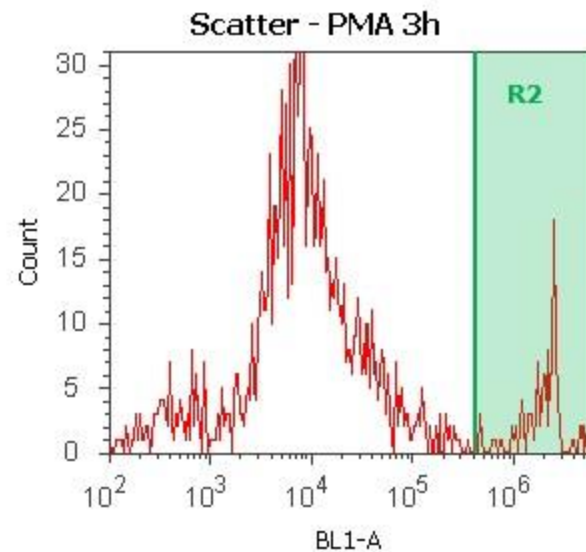

Experiment Name: **07-13-2015 05 00 PM**

Specimen Name: **Specimen**

Sample Name: **PMA 3h**

| Name                                           | Event Count | % Parent | % Total  | Mean X    | Mean Y    | Median X  | Median Y  |
|------------------------------------------------|-------------|----------|----------|-----------|-----------|-----------|-----------|
| <input checked="" type="checkbox"/> All Events | 20,000      | ---      | 100.000% | 929,373   | 660,957   | 786,643   | 453,350   |
| <input checked="" type="checkbox"/> R1         | 1,883       | 9.415%   | 9.415%   | 2,136,337 | 2,221,666 | 1,965,967 | 1,885,244 |
| <input type="checkbox"/> R                     | 125         | 6.638%   | 0.625%   | 2,133,025 | ---       | 2,149,155 | ---       |

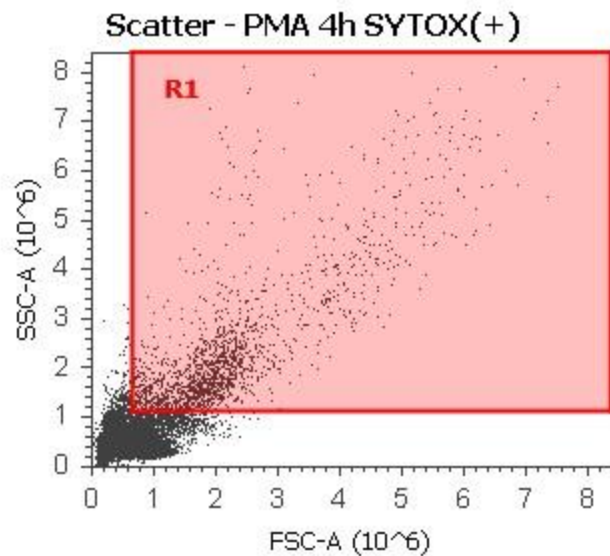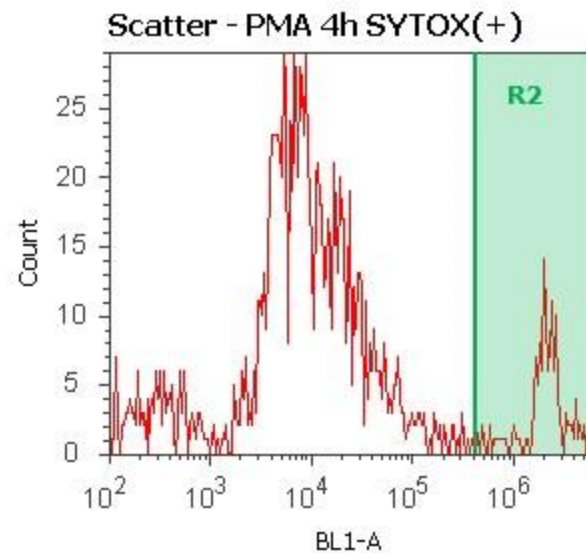

Experiment Name: **07-13-2015 05 00 PM**

Specimen Name: **Specimen**

Sample Name: **PMA 4h SYTOX(+)**

| Name                                           | Event Count | % Parent | % Total  | Mean X    | Mean Y    | Median X  | Median Y  |
|------------------------------------------------|-------------|----------|----------|-----------|-----------|-----------|-----------|
| <input checked="" type="checkbox"/> All Events | 20,000      | ---      | 100.000% | 870,977   | 687,203   | 744,721   | 489,865   |
| <input checked="" type="checkbox"/> R1         | 1,752       | 8.760%   | 8.760%   | 2,251,358 | 2,356,933 | 1,985,273 | 1,870,934 |
| <input type="checkbox"/> R                     | 158         | 9.018%   | 0.790%   | 2,319,283 | ---       | 2,141,737 | ---       |

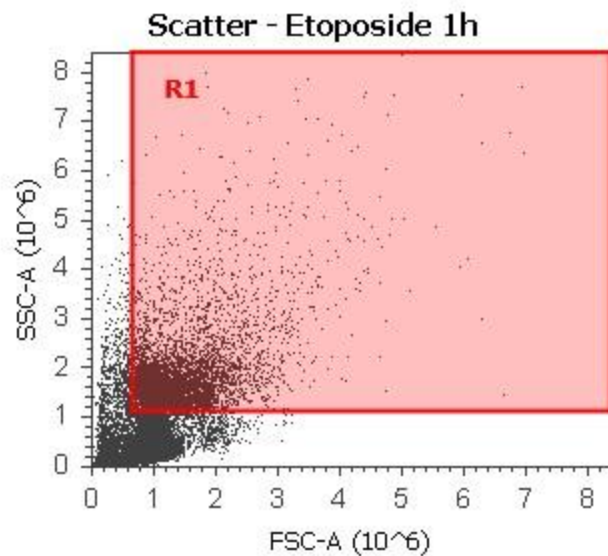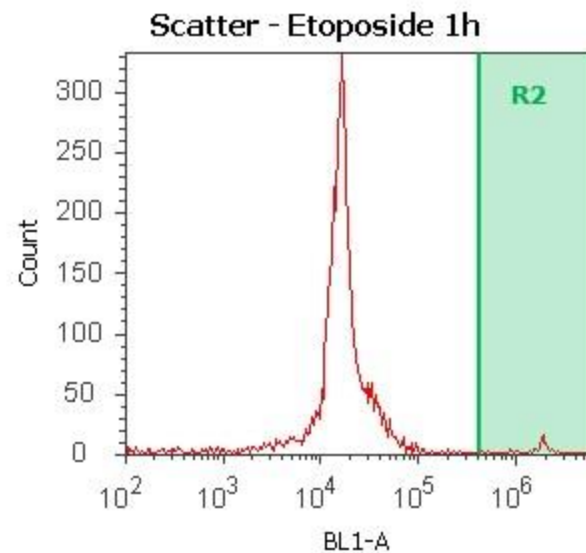

Experiment Name: **07-13-2015 05 00 PM**

Specimen Name: **Specimen**

Sample Name: **Etoposide 1h**

| Name                                           | Event Count | % Parent | % Total  | Mean X    | Mean Y    | Median X  | Median Y  |
|------------------------------------------------|-------------|----------|----------|-----------|-----------|-----------|-----------|
| <input checked="" type="checkbox"/> All Events | 20,000      | ---      | 100.000% | 956,803   | 862,320   | 955,756   | 493,448   |
| <input checked="" type="checkbox"/> R1         | 5,961       | 29.805%  | 29.805%  | 1,469,633 | 1,868,612 | 1,299,299 | 1,614,928 |
| <input type="checkbox"/> R                     | 106         | 1.778%   | 0.530%   | 1,863,095 | ---       | 1,880,537 | ---       |

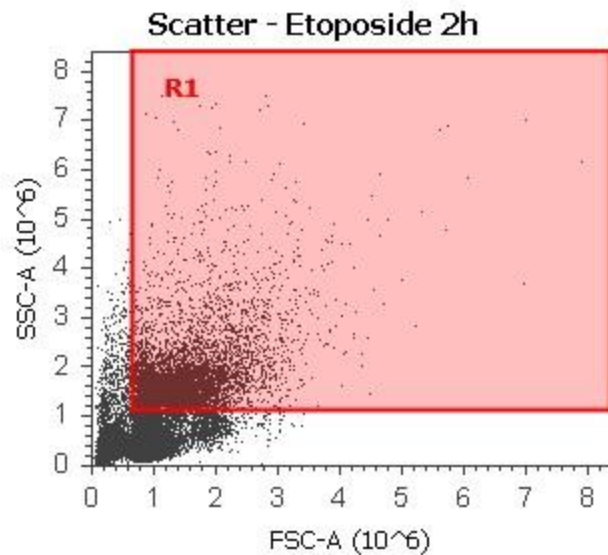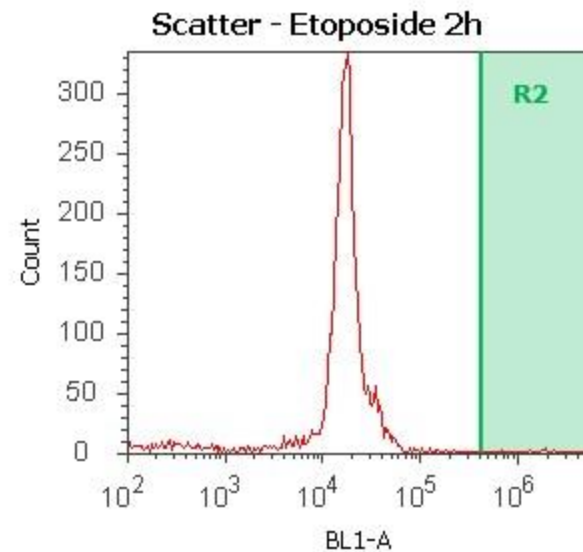

Experiment Name: **07-13-2015 05 00 PM**

Specimen Name: **Specimen**

Sample Name: **Etoposide 2h**

| Name                                           | Event Count | % Parent | % Total  | Mean X    | Mean Y    | Median X  | Median Y  |
|------------------------------------------------|-------------|----------|----------|-----------|-----------|-----------|-----------|
| <input checked="" type="checkbox"/> All Events | 20,000      | ---      | 100.000% | 1,147,230 | 943,347   | 1,050,802 | 610,486   |
| <input checked="" type="checkbox"/> R1         | 6,263       | 31.315%  | 31.315%  | 1,544,729 | 1,843,878 | 1,422,573 | 1,627,926 |
| <input type="checkbox"/> R                     | 35          | 0.559%   | 0.175%   | 1,770,896 | ---       | 1,816,247 | ---       |

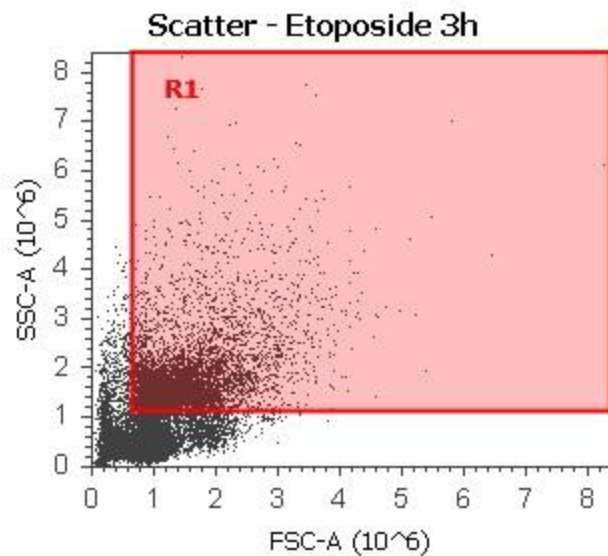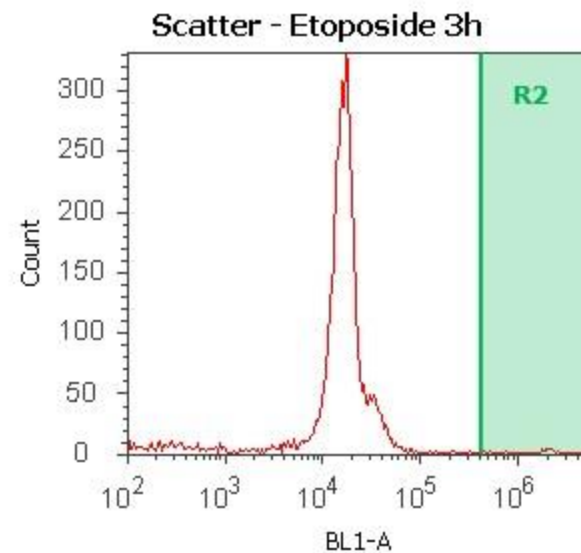

Experiment Name: **07-13-2015 05 00 PM**

Specimen Name: **Specimen**

Sample Name: **Etoposide 3h**

| Name                                           | Event Count | % Parent | % Total  | Mean X    | Mean Y    | Median X  | Median Y  |
|------------------------------------------------|-------------|----------|----------|-----------|-----------|-----------|-----------|
| <input checked="" type="checkbox"/> All Events | 20,000      | ---      | 100.000% | 1,160,469 | 958,150   | 1,050,625 | 632,448   |
| <input checked="" type="checkbox"/> R1         | 6,478       | 32.390%  | 32.390%  | 1,551,932 | 1,843,798 | 1,401,765 | 1,623,851 |
| <input type="checkbox"/> R                     | 40          | 0.617%   | 0.200%   | 1,896,717 | ---       | 1,987,805 | ---       |

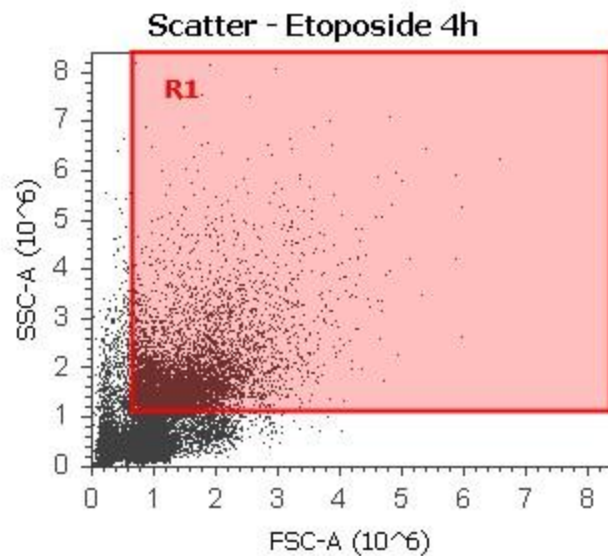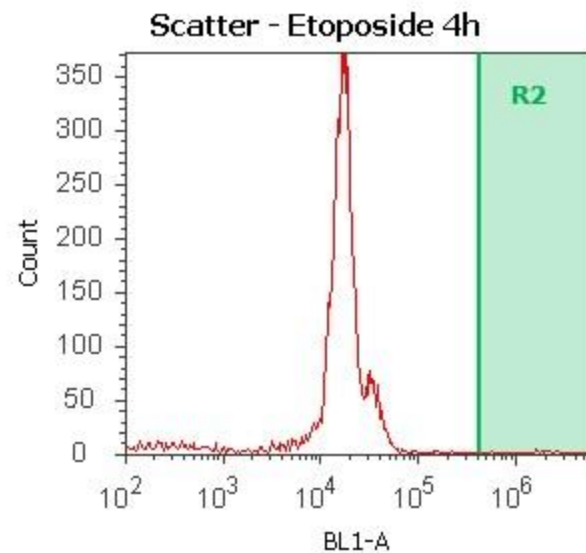

Experiment Name: **07-13-2015 05 00 PM**

Specimen Name: **Specimen**

Sample Name: **Etoposide 4h**

| Name                                           | Event Count | % Parent | % Total  | Mean X    | Mean Y    | Median X  | Median Y  |
|------------------------------------------------|-------------|----------|----------|-----------|-----------|-----------|-----------|
| <input checked="" type="checkbox"/> All Events | 20,000      | ---      | 100.000% | 1,157,157 | 1,010,696 | 1,042,618 | 690,139   |
| <input checked="" type="checkbox"/> R1         | 7,047       | 35.235%  | 35.235%  | 1,524,217 | 1,868,038 | 1,357,133 | 1,621,905 |
| <input type="checkbox"/> R                     | 35          | 0.497%   | 0.175%   | 1,701,588 | ---       | 1,782,035 | ---       |



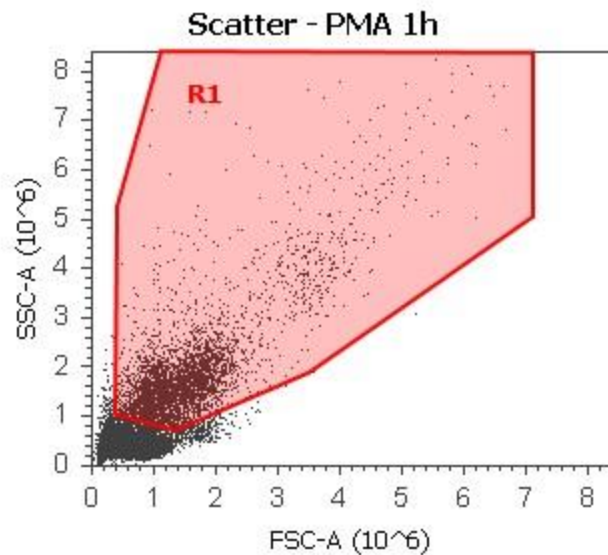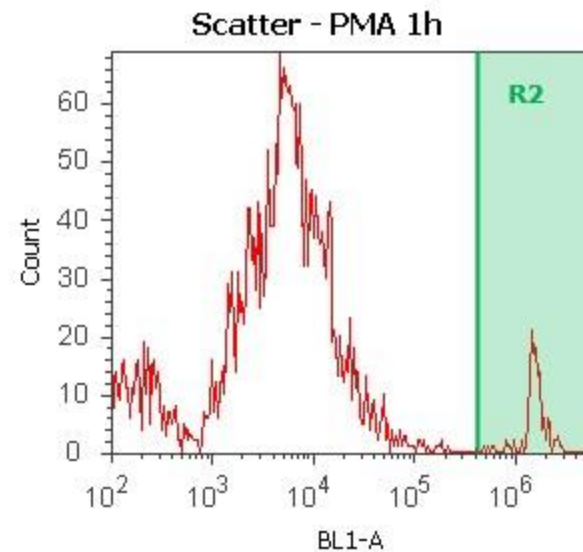

Experiment Name: **07-13-2015 05 00 PM(1)**

Specimen Name: **Specimen**

Sample Name: **PMA 1h**

| Name                                           | Event Count | % Parent | % Total  | Mean X    | Mean Y    | Median X  | Median Y  |
|------------------------------------------------|-------------|----------|----------|-----------|-----------|-----------|-----------|
| <input checked="" type="checkbox"/> All Events | 20,000      | ---      | 100.000% | 973,043   | 694,819   | 883,019   | 386,219   |
| <input checked="" type="checkbox"/> R1         | 3,887       | 19.435%  | 19.435%  | 1,630,683 | 1,919,901 | 1,436,219 | 1,616,170 |
| <input type="checkbox"/> R                     | 151         | 3.885%   | 0.755%   | 1,646,837 | ---       | 1,597,147 | ---       |

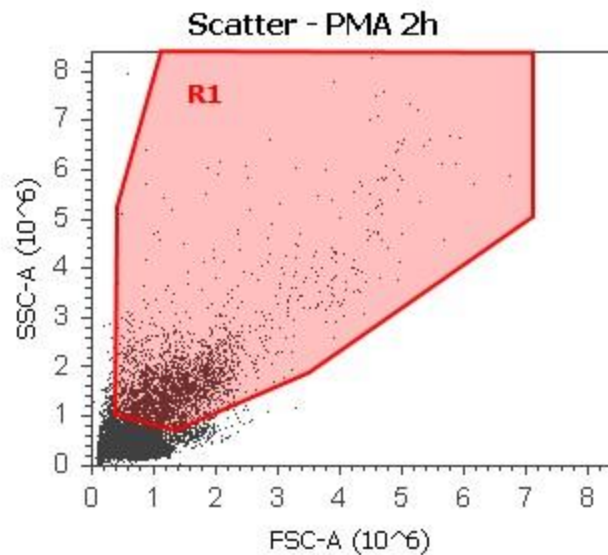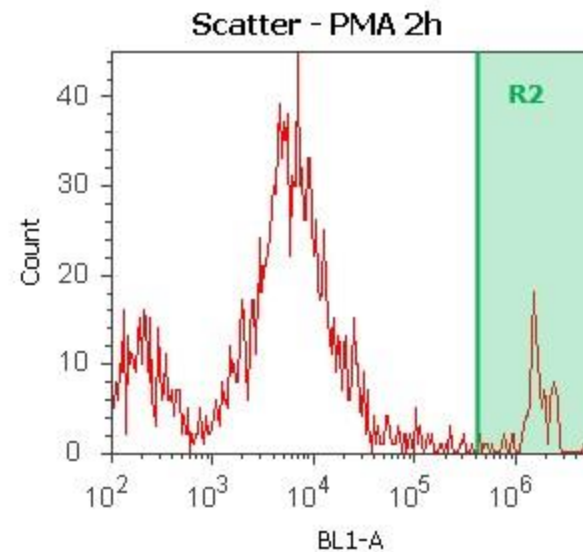

Experiment Name: **07-13-2015 05 00 PM(1)**

Specimen Name: **Specimen**

Sample Name: **PMA 2h**

| Name                                           | Event Count | % Parent | % Total  | Mean X    | Mean Y    | Median X  | Median Y  |
|------------------------------------------------|-------------|----------|----------|-----------|-----------|-----------|-----------|
| <input checked="" type="checkbox"/> All Events | 20,000      | ---      | 100.000% | 859,828   | 567,287   | 808,959   | 372,134   |
| <input checked="" type="checkbox"/> R1         | 2,619       | 13.095%  | 13.095%  | 1,505,858 | 1,769,715 | 1,332,140 | 1,537,424 |
| <input type="checkbox"/> R                     | 158         | 6.033%   | 0.790%   | 1,760,916 | ---       | 1,650,528 | ---       |

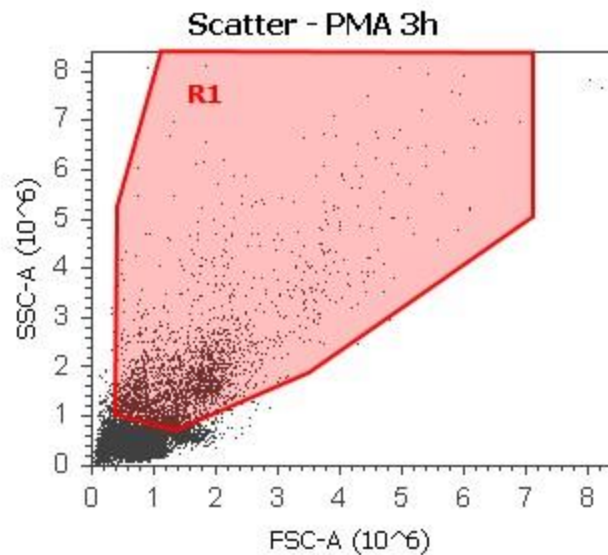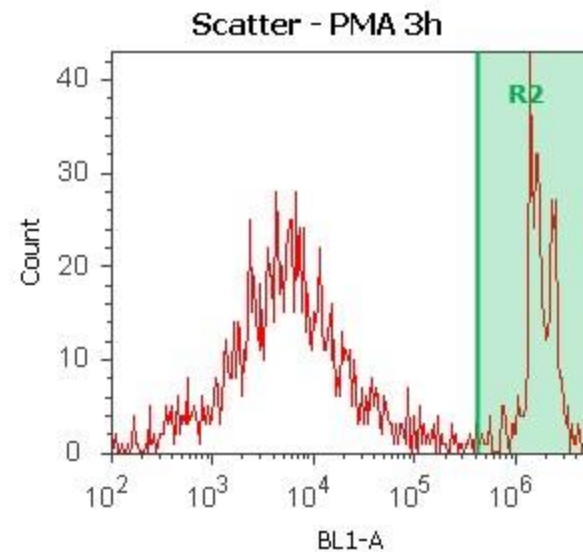

Experiment Name: **07-13-2015 05 00 PM(1)**

Specimen Name: **Specimen**

Sample Name: **PMA 3h**

| Name                                           | Event Count | % Parent | % Total  | Mean X    | Mean Y    | Median X  | Median Y  |
|------------------------------------------------|-------------|----------|----------|-----------|-----------|-----------|-----------|
| <input checked="" type="checkbox"/> All Events | 20,000      | ---      | 100.000% | 855,132   | 589,241   | 758,225   | 370,303   |
| <input checked="" type="checkbox"/> R1         | 2,574       | 12.870%  | 12.870%  | 1,597,004 | 1,864,269 | 1,441,557 | 1,555,450 |
| <input type="checkbox"/> R                     | 486         | 18.881%  | 2.430%   | 1,983,631 | ---       | 1,757,307 | ---       |

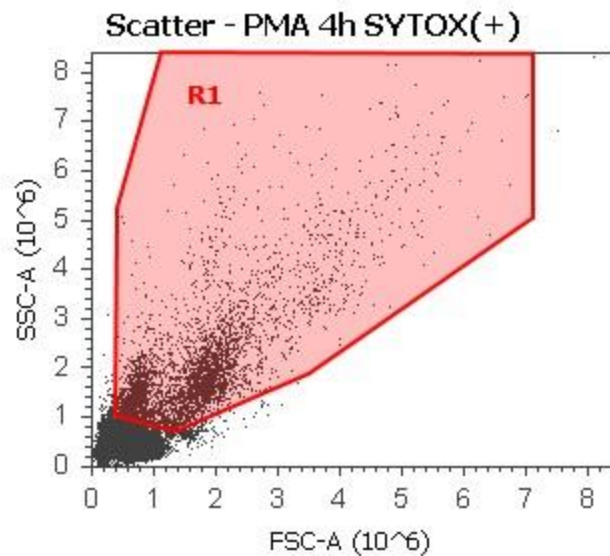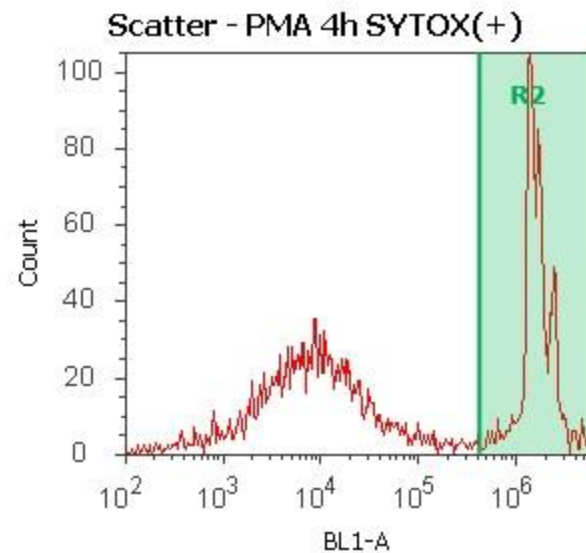

Experiment Name: **07-13-2015 05 00 PM(1)**

Specimen Name: **Specimen**

Sample Name: **PMA 4h SYTOX(+)**

| Name                                           | Event Count | % Parent | % Total  | Mean X    | Mean Y    | Median X  | Median Y  |
|------------------------------------------------|-------------|----------|----------|-----------|-----------|-----------|-----------|
| <input checked="" type="checkbox"/> All Events | 20,000      | ---      | 100.000% | 867,355   | 756,692   | 689,168   | 426,186   |
| <input checked="" type="checkbox"/> R1         | 3,912       | 19.560%  | 19.560%  | 1,739,377 | 2,051,017 | 1,646,146 | 1,685,297 |
| <input type="checkbox"/> R                     | 1,271       | 32.490%  | 6.355%   | 1,831,334 | ---       | 1,644,178 | ---       |

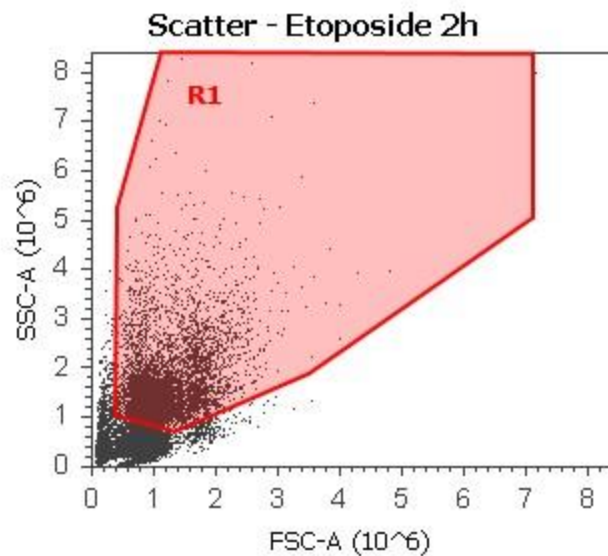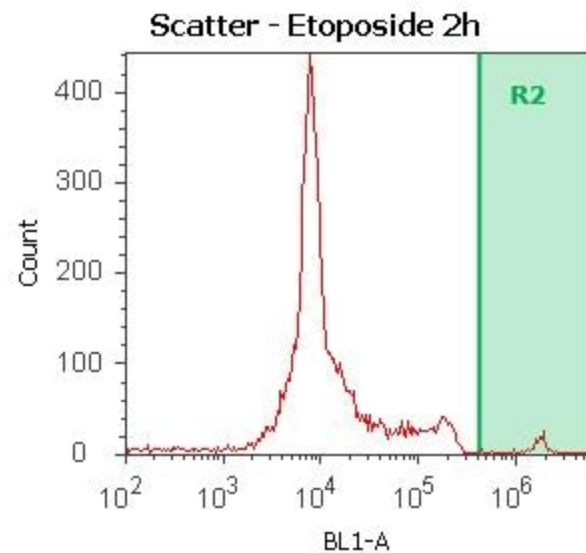

Experiment Name: **07-13-2015 05 00 PM(1)**

Specimen Name: **Specimen**

Sample Name: **Etoposide 2h**

| Name                                           | Event Count | % Parent | % Total  | Mean X    | Mean Y    | Median X  | Median Y  |
|------------------------------------------------|-------------|----------|----------|-----------|-----------|-----------|-----------|
| <input checked="" type="checkbox"/> All Events | 20,000      | ---      | 100.000% | 979,562   | 976,462   | 931,936   | 913,477   |
| <input checked="" type="checkbox"/> R1         | 10,219      | 51.095%  | 51.095%  | 1,087,223 | 1,474,184 | 955,395   | 1,295,859 |
| <input type="checkbox"/> R                     | 166         | 1.624%   | 0.830%   | 1,718,800 | ---       | 1,786,971 | ---       |

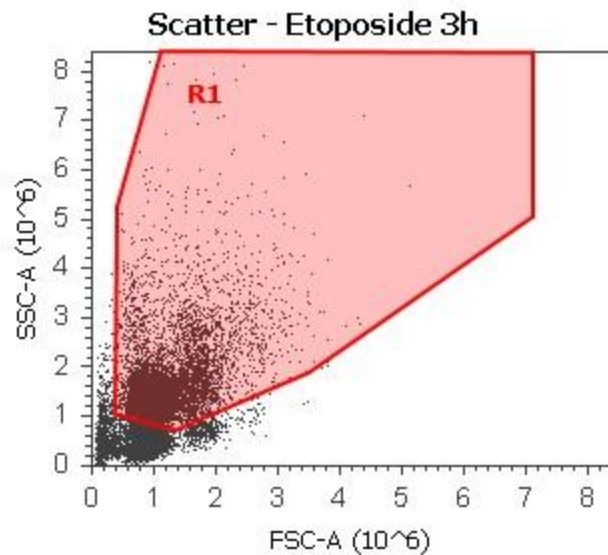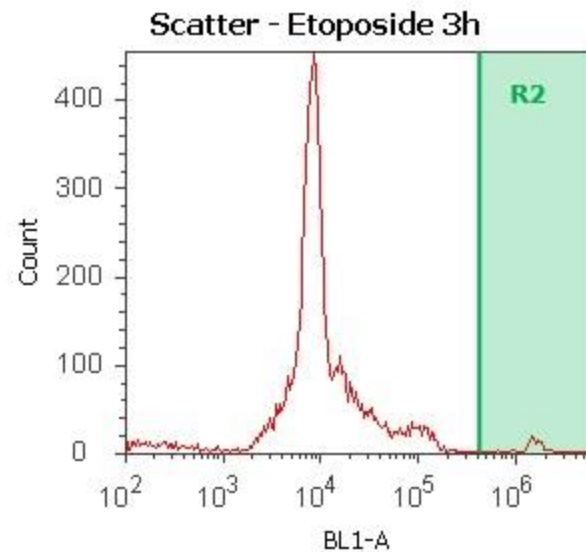

Experiment Name: **07-13-2015 05 00 PM(1)**

Specimen Name: **Specimen**

Sample Name: **Etoposide 3h**

| Name                                           | Event Count | % Parent | % Total  | Mean X    | Mean Y    | Median X  | Median Y  |
|------------------------------------------------|-------------|----------|----------|-----------|-----------|-----------|-----------|
| <input checked="" type="checkbox"/> All Events | 20,000      | ---      | 100.000% | 1,019,514 | 1,024,803 | 938,661   | 919,972   |
| <input checked="" type="checkbox"/> R1         | 10,118      | 50.590%  | 50.590%  | 1,141,947 | 1,589,680 | 955,884   | 1,378,213 |
| <input type="checkbox"/> R                     | 144         | 1.423%   | 0.720%   | 1,589,331 | ---       | 1,578,984 | ---       |

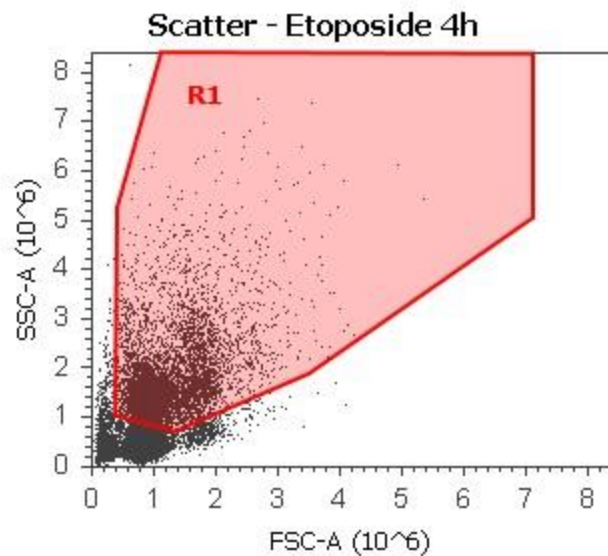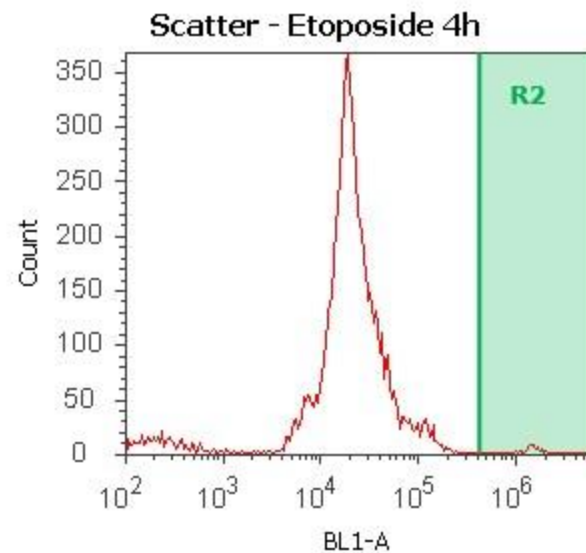

Experiment Name: **07-13-2015 05 00 PM(1)**

Specimen Name: **Specimen**

Sample Name: **Etoposide 4h**

| Name                                                            | Event Count | % Parent | % Total  | Mean X    | Mean Y    | Median X  | Median Y  |
|-----------------------------------------------------------------|-------------|----------|----------|-----------|-----------|-----------|-----------|
| <input type="checkbox"/> All Events                             | 20,000      | ---      | 100.000% | 1,017,853 | 1,024,926 | 941,566   | 910,352   |
| <input type="checkbox"/> <span style="color: red;">■</span> R1  | 9,964       | 49.820%  | 49.820%  | 1,136,845 | 1,601,308 | 956,017   | 1,400,317 |
| <input type="checkbox"/> <span style="color: green;">■</span> R | 67          | 0.672%   | 0.335%   | 1,596,156 | ---       | 1,516,863 | ---       |

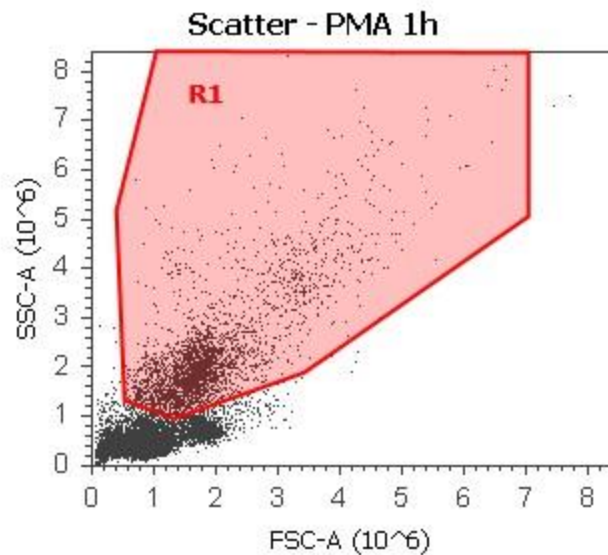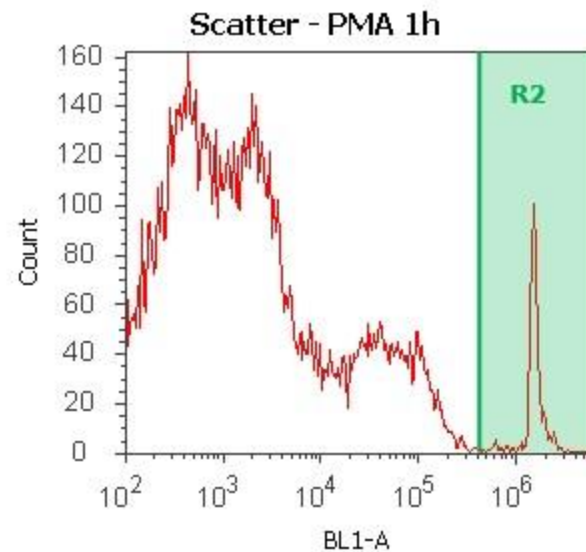

Experiment Name: **09-03-2015 05 00 PM(3)**

Specimen Name: **Specimen**

Sample Name: **PMA 1h**

| Name                                           | Event Count | % Parent | % Total  | Mean X    | Mean Y    | Median X  | Median Y  |
|------------------------------------------------|-------------|----------|----------|-----------|-----------|-----------|-----------|
| <input checked="" type="checkbox"/> All Events | 100,000     | ---      | 100.000% | 1,147,544 | 763,047   | 980,517   | 390,268   |
| <input checked="" type="checkbox"/> R1         | 18,428      | 18.428%  | 18.428%  | 1,963,225 | 2,291,100 | 1,739,524 | 1,934,617 |
| <input type="checkbox"/> R2                    | 532         | 2.887%   | 0.532%   | 1,596,284 | ---       | 1,563,337 | ---       |



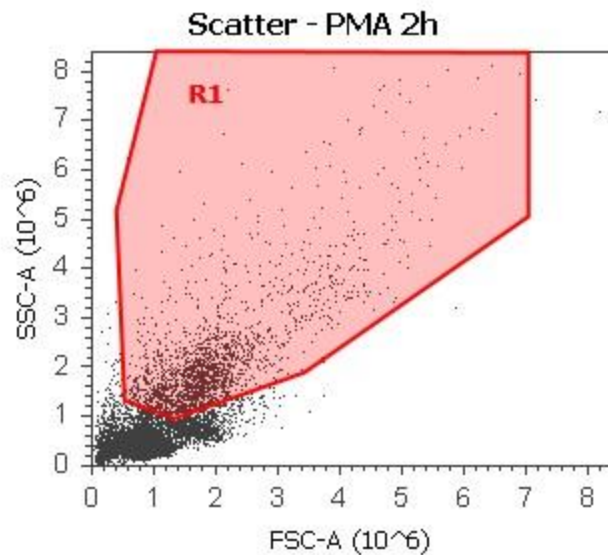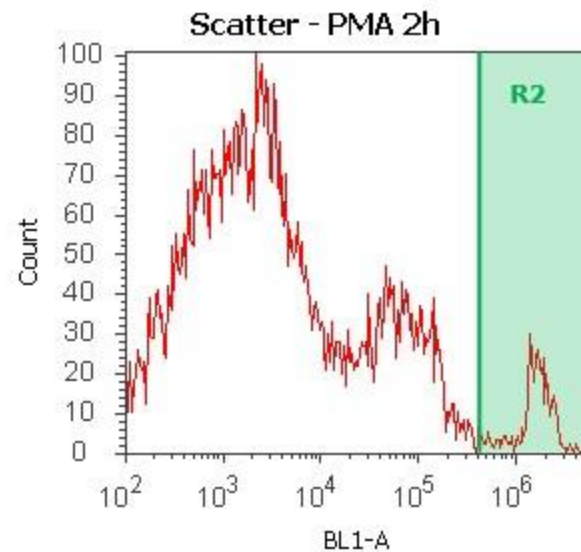

Experiment Name: **09-03-2015 05 00 PM(3)**

Specimen Name: **Specimen**

Sample Name: **PMA 2h**

| Name                                           | Event Count | % Parent | % Total  | Mean X    | Mean Y    | Median X  | Median Y  |
|------------------------------------------------|-------------|----------|----------|-----------|-----------|-----------|-----------|
| <input checked="" type="checkbox"/> All Events | 100,000     | ---      | 100.000% | 1,060,127 | 660,002   | 925,542   | 393,924   |
| <input checked="" type="checkbox"/> R1         | 12,576      | 12.576%  | 12.576%  | 2,017,455 | 2,207,189 | 1,804,128 | 1,844,880 |
| <input checked="" type="checkbox"/> R2         | 399         | 3.173%   | 0.399%   | 1,718,749 | ---       | 1,676,605 | ---       |

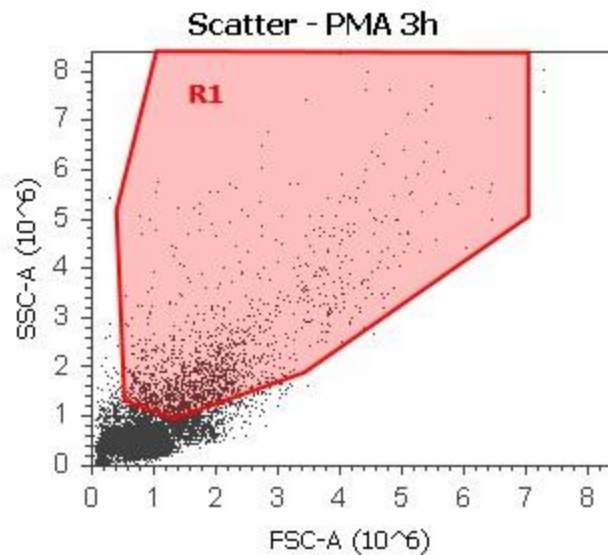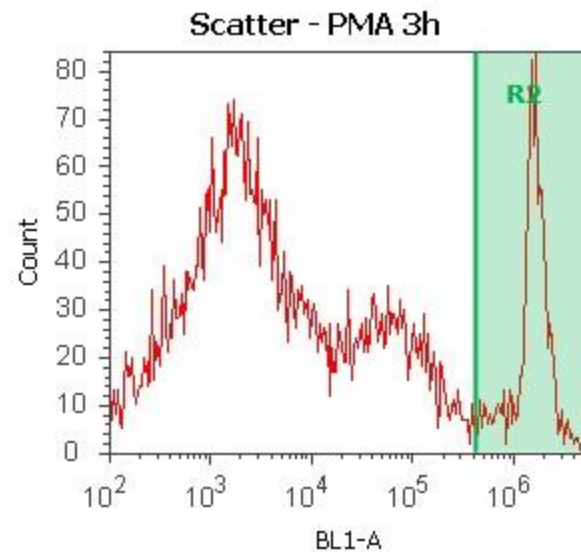

Experiment Name: **09-03-2015 05 00 PM(3)**

Specimen Name: **Specimen**

Sample Name: **PMA 3h**

| Name                                           | Event Count | % Parent | % Total  | Mean X    | Mean Y    | Median X  | Median Y  |
|------------------------------------------------|-------------|----------|----------|-----------|-----------|-----------|-----------|
| <input checked="" type="checkbox"/> All Events | 100,000     | ---      | 100.000% | 982,108   | 645,389   | 851,976   | 417,051   |
| <input checked="" type="checkbox"/> R1         | 10,614      | 10.614%  | 10.614%  | 2,043,153 | 2,171,181 | 1,820,857 | 1,758,975 |
| <input checked="" type="checkbox"/> R2         | 1,058       | 9.968%   | 1.058%   | 1,672,741 | ---       | 1,624,952 | ---       |

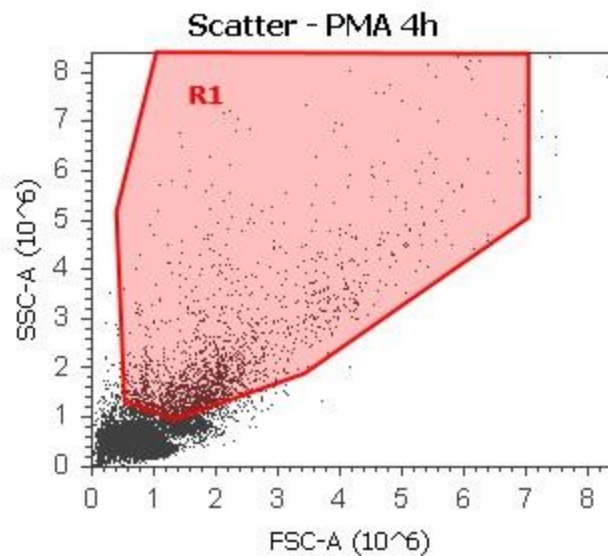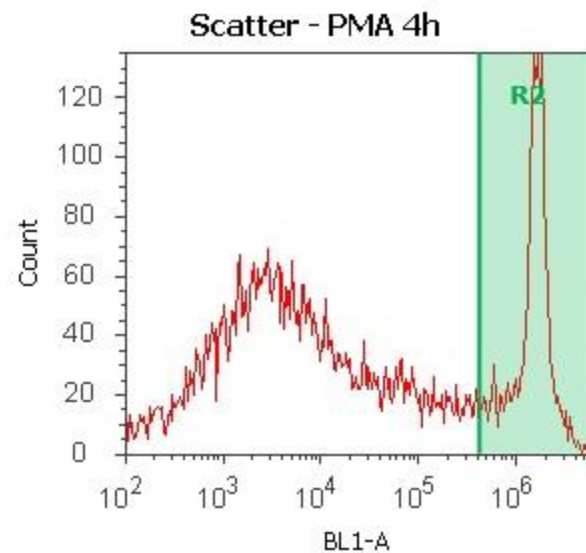

Experiment Name: **09-03-2015 05 00 PM(3)**

Specimen Name: **Specimen**

Sample Name: **PMA 4h**

| Name                                           | Event Count | % Parent | % Total  | Mean X    | Mean Y    | Median X  | Median Y  |
|------------------------------------------------|-------------|----------|----------|-----------|-----------|-----------|-----------|
| <input checked="" type="checkbox"/> All Events | 100,000     | ---      | 100.000% | 984,902   | 721,602   | 822,746   | 455,581   |
| <input checked="" type="checkbox"/> R1         | 12,684      | 12.684%  | 12.684%  | 2,089,298 | 2,173,423 | 1,842,123 | 1,713,997 |
| <input checked="" type="checkbox"/> R2         | 2,011       | 15.855%  | 2.011%   | 1,627,390 | ---       | 1,614,357 | ---       |

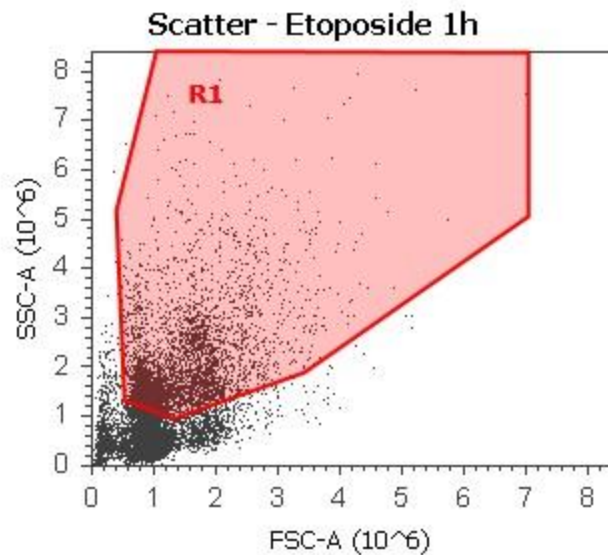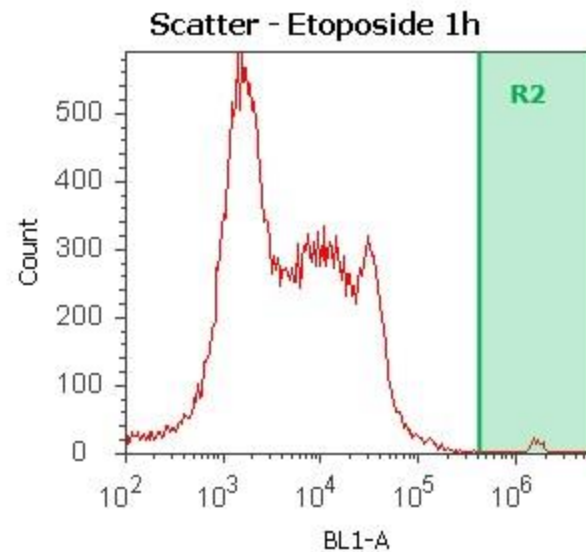

Experiment Name: **09-03-2015 05 00 PM(3)**

Specimen Name: **Specimen**

Sample Name: **Etoposide 1h**

| Name                                           | Event Count | % Parent | % Total  | Mean X    | Mean Y    | Median X  | Median Y  |
|------------------------------------------------|-------------|----------|----------|-----------|-----------|-----------|-----------|
| <input checked="" type="checkbox"/> All Events | 100,000     | ---      | 100.000% | 1,117,921 | 1,065,947 | 984,889   | 923,512   |
| <input checked="" type="checkbox"/> R1         | 39,408      | 39.408%  | 39.408%  | 1,320,540 | 1,855,002 | 1,038,738 | 1,527,274 |
| <input type="checkbox"/> R2                    | 179         | 0.454%   | 0.179%   | 1,676,142 | ---       | 1,644,898 | ---       |

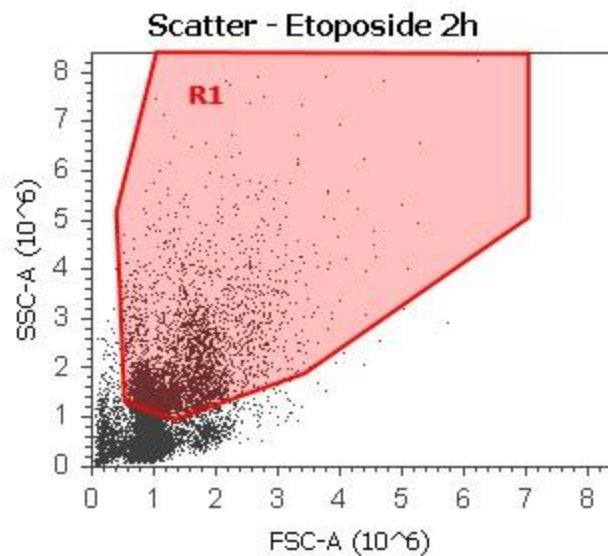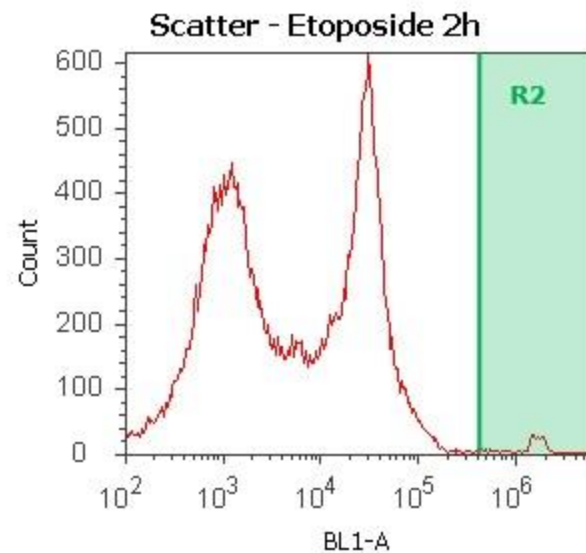

Experiment Name: **09-03-2015 05 00 PM(3)**

Specimen Name: **Specimen**

Sample Name: **Etoposide 2h**

| Name                                           | Event Count | % Parent | % Total  | Mean X    | Mean Y    | Median X  | Median Y  |
|------------------------------------------------|-------------|----------|----------|-----------|-----------|-----------|-----------|
| <input checked="" type="checkbox"/> All Events | 100,000     | ---      | 100.000% | 1,104,167 | 1,087,992 | 985,756   | 990,179   |
| <input checked="" type="checkbox"/> R1         | 42,070      | 42.070%  | 42.070%  | 1,294,804 | 1,821,473 | 1,046,269 | 1,518,194 |
| <input type="checkbox"/> R2                    | 347         | 0.825%   | 0.347%   | 1,540,698 | ---       | 1,603,953 | ---       |

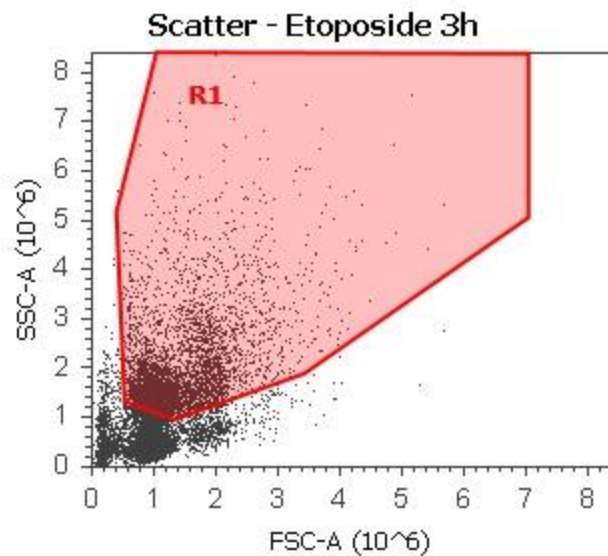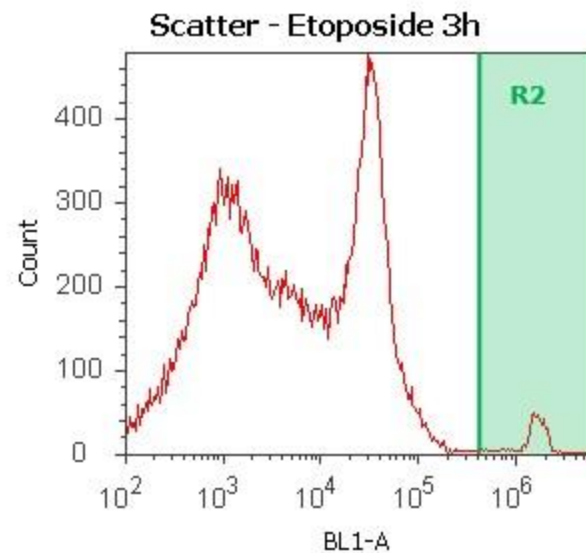

Experiment Name: **09-03-2015 05 00 PM(3)**

Specimen Name: **Specimen**

Sample Name: **Etoposide 3h**

| Name                                           | Event Count | % Parent | % Total  | Mean X    | Mean Y    | Median X  | Median Y  |
|------------------------------------------------|-------------|----------|----------|-----------|-----------|-----------|-----------|
| <input checked="" type="checkbox"/> All Events | 100,000     | ---      | 100.000% | 1,126,933 | 1,098,610 | 1,008,405 | 982,751   |
| <input checked="" type="checkbox"/> R1         | 42,601      | 42.601%  | 42.601%  | 1,334,071 | 1,839,282 | 1,098,259 | 1,534,746 |
| <input type="checkbox"/> R2                    | 595         | 1.397%   | 0.595%   | 1,616,985 | ---       | 1,640,746 | ---       |

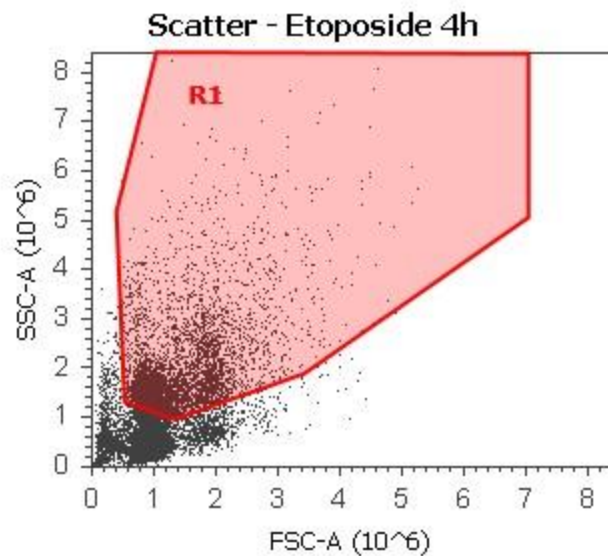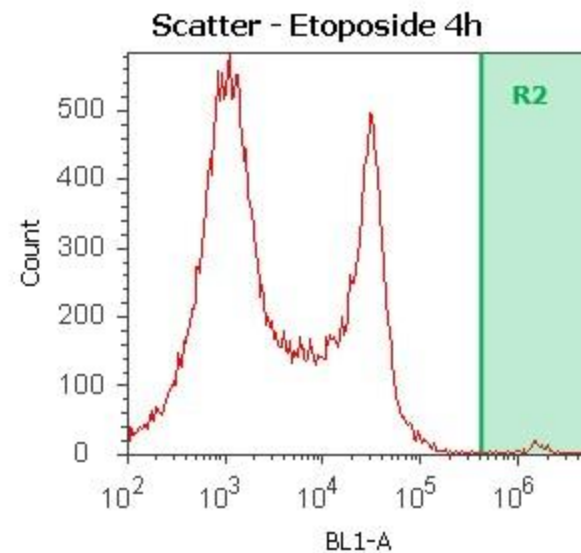

Experiment Name: **09-03-2015 05 00 PM(3)**

Specimen Name: **Specimen**

Sample Name: **Etoposide 4h**

| Name                                           | Event Count | % Parent | % Total  | Mean X    | Mean Y    | Median X  | Median Y  |
|------------------------------------------------|-------------|----------|----------|-----------|-----------|-----------|-----------|
| <input checked="" type="checkbox"/> All Events | 100,000     | ---      | 100.000% | 1,136,632 | 1,089,487 | 1,015,406 | 962,896   |
| <input checked="" type="checkbox"/> R1         | 42,376      | 42.376%  | 42.376%  | 1,330,445 | 1,833,772 | 1,089,673 | 1,525,978 |
| <input type="checkbox"/> R2                    | 185         | 0.437%   | 0.185%   | 1,673,265 | ---       | 1,570,563 | ---       |
