# Supplementary material for: Measurement of NET formation in vitro and in vivo by flow cytometry
Source: PubMed Central journal article supplement — Cytometry A. 2017 Jul 17;91(8):822–9. doi: 10.1002/cyto.a.23169 (PMC5601186; doi:10.1002/cyto.a.23169), 2017-07-17
Supplement: CYTO-91-822-s005.pdf [file CYTO-91-822-s005.pdf]

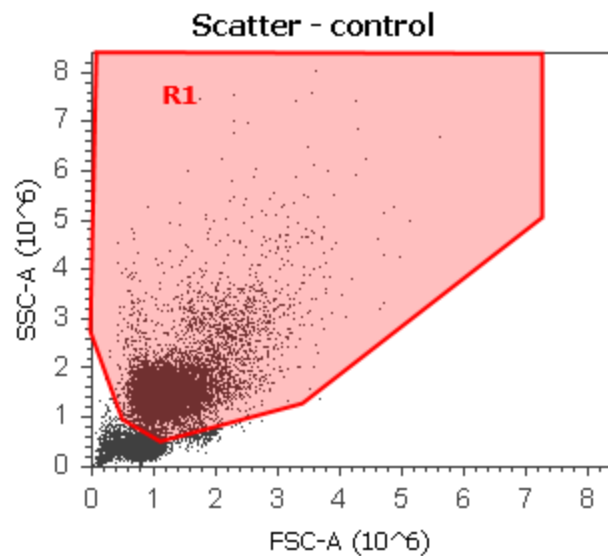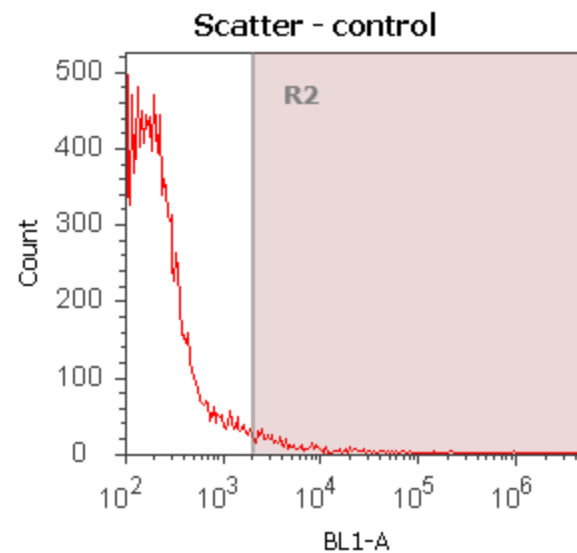

Experiment Name: **08-22-2016 05 00 PM(10)**

Specimen Name: **Specimen**

Sample Name: **control**

| Name                                           | Event Count | % Parent | % Total  | Mean X    | Mean Y    | Median X  | Median Y  |
|------------------------------------------------|-------------|----------|----------|-----------|-----------|-----------|-----------|
| <input checked="" type="checkbox"/> All Events | 100,000     | ---      | 100.000% | 1,142,126 | 1,086,571 | 1,003,702 | 1,093,579 |
| <input checked="" type="checkbox"/> R1         | 57,392      | 57.392%  | 57.392%  | 1,365,450 | 1,623,524 | 1,228,753 | 1,472,292 |
| <input type="checkbox"/> R2                    | 738         | 1.286%   | 0.738%   | 77,181    | ---       | 4,823     | ---       |

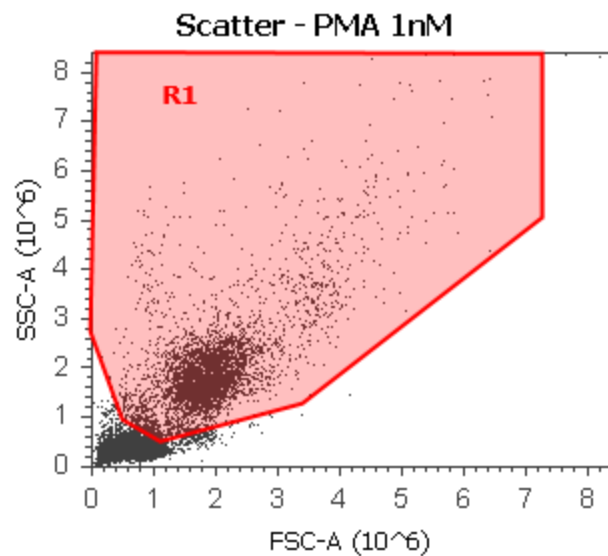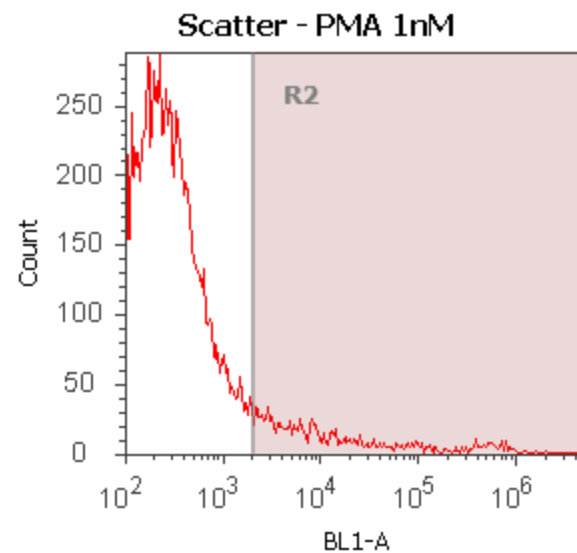

Experiment Name: **08-22-2016 05 00 PM(10)**

Specimen Name: **Specimen**

Sample Name: **PMA 1nM**

| Name                                           | Event Count | % Parent | % Total  | Mean X    | Mean Y    | Median X  | Median Y  |
|------------------------------------------------|-------------|----------|----------|-----------|-----------|-----------|-----------|
| <input checked="" type="checkbox"/> All Events | 100,000     | ---      | 100.000% | 1,197,810 | 870,369   | 938,814   | 382,210   |
| <input checked="" type="checkbox"/> R1         | 30,646      | 30.646%  | 30.646%  | 1,970,726 | 1,948,508 | 1,879,166 | 1,765,183 |
| <input type="checkbox"/> R2                    | 1,402       | 4.575%   | 1.402%   | 105,107   | ---       | 8,592     | ---       |

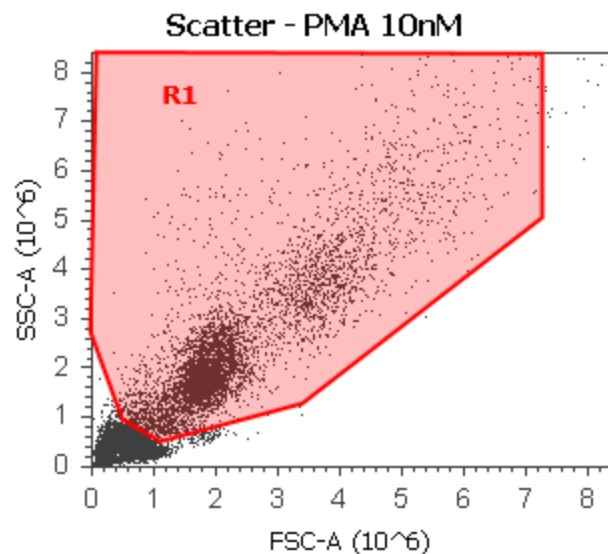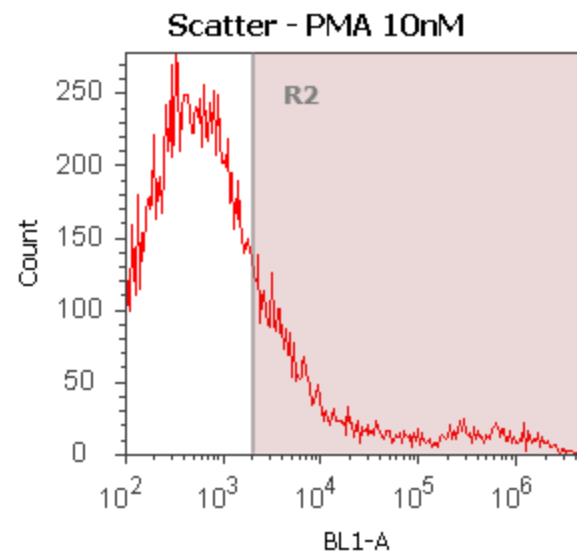

Experiment Name: **08-22-2016 05 00 PM(10)**

Specimen Name: **Specimen**

Sample Name: **PMA 10nM**

| Name                                           | Event Count | % Parent | % Total  | Mean X    | Mean Y    | Median X  | Median Y  |
|------------------------------------------------|-------------|----------|----------|-----------|-----------|-----------|-----------|
| <input checked="" type="checkbox"/> All Events | 100,000     | ---      | 100.000% | 1,310,200 | 1,244,783 | 753,763   | 480,122   |
| <input checked="" type="checkbox"/> R1         | 33,729      | 33.729%  | 33.729%  | 2,409,564 | 2,536,347 | 2,003,648 | 2,057,430 |
| <input type="checkbox"/> R2                    | 4,682       | 13.881%  | 4.682%   | 154,194   | ---       | 6,306     | ---       |

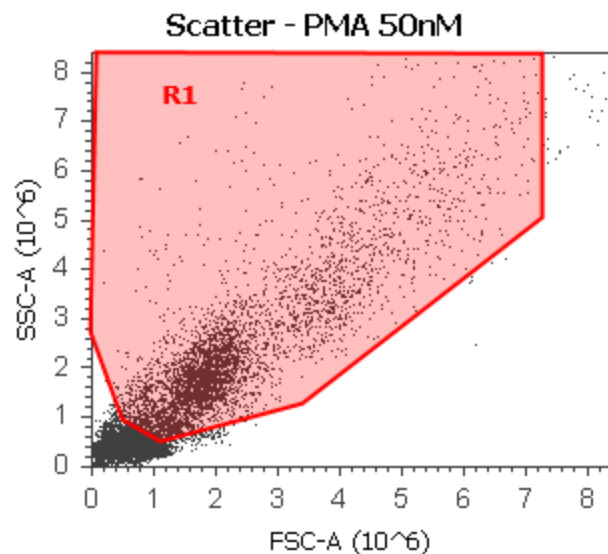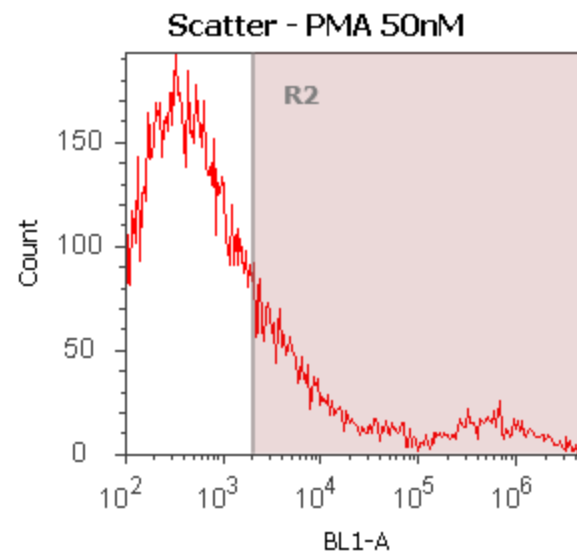

Experiment Name: **08-22-2016 05 00 PM(10)**

Specimen Name: **Specimen**

Sample Name: **PMA 50nM**

| Name                                           | Event Count | % Parent | % Total  | Mean X    | Mean Y    | Median X  | Median Y  |
|------------------------------------------------|-------------|----------|----------|-----------|-----------|-----------|-----------|
| <input checked="" type="checkbox"/> All Events | 100,000     | ---      | 100.000% | 1,277,700 | 1,142,417 | 776,261   | 459,508   |
| <input checked="" type="checkbox"/> R1         | 29,992      | 29.992%  | 29.992%  | 2,362,175 | 2,365,021 | 1,976,721 | 1,925,086 |
| <input type="checkbox"/> R2                    | 3,562       | 11.877%  | 3.562%   | 237,836   | ---       | 8,481     | ---       |

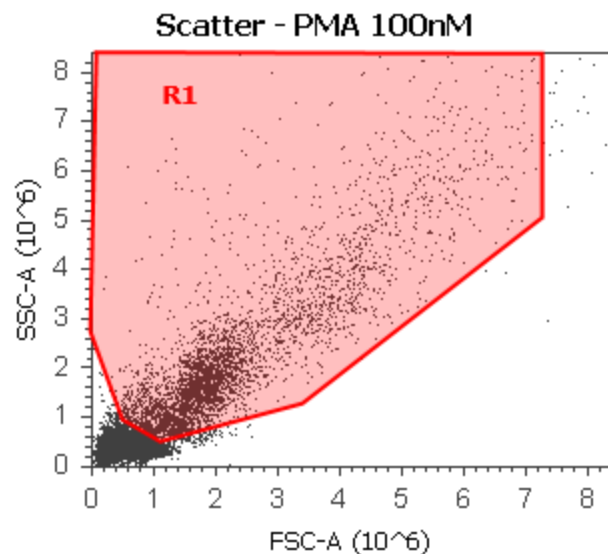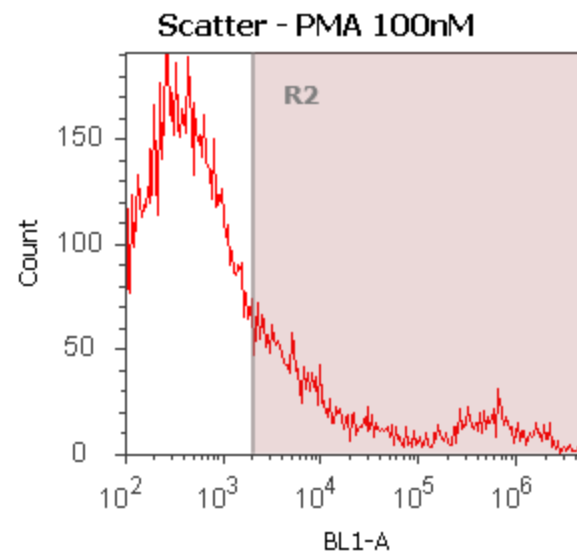

Experiment Name: **08-22-2016 05 00 PM(10)**

Specimen Name: **Specimen**

Sample Name: **PMA 100nM**

| Name                                           | Event Count | % Parent | % Total  | Mean X    | Mean Y    | Median X  | Median Y  |
|------------------------------------------------|-------------|----------|----------|-----------|-----------|-----------|-----------|
| <input checked="" type="checkbox"/> All Events | 100,000     | ---      | 100.000% | 1,204,077 | 1,033,079 | 746,450   | 444,405   |
| <input checked="" type="checkbox"/> R1         | 26,145      | 26.145%  | 26.145%  | 2,305,872 | 2,257,405 | 1,931,880 | 1,808,210 |
| <input type="checkbox"/> R2                    | 3,295       | 12.603%  | 3.295%   | 238,462   | ---       | 9,471     | ---       |

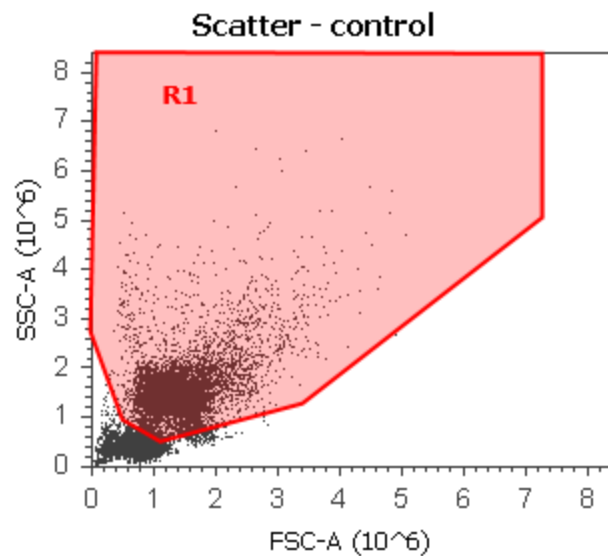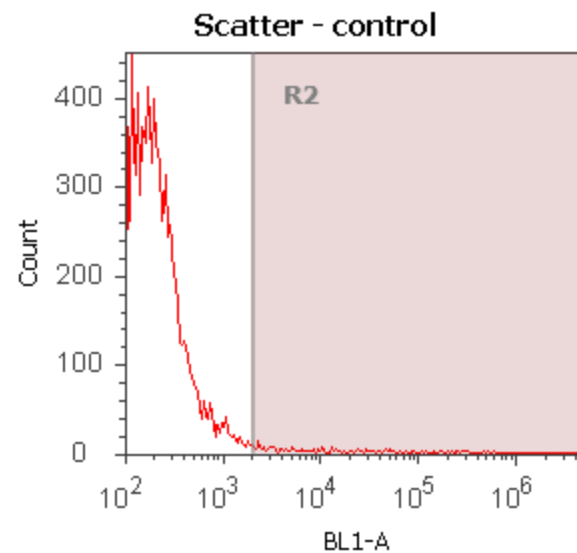

Experiment Name: **08-26-2016 05 00 PM(11)**

Specimen Name: **Specimen**

Sample Name: **control**

| Name                                           | Event Count | % Parent | % Total  | Mean X    | Mean Y    | Median X  | Median Y  |
|------------------------------------------------|-------------|----------|----------|-----------|-----------|-----------|-----------|
| <input checked="" type="checkbox"/> All Events | 100,000     | ---      | 100.000% | 1,132,338 | 873,641   | 982,732   | 499,991   |
| <input checked="" type="checkbox"/> R1         | 42,681      | 42.681%  | 42.681%  | 1,491,713 | 1,546,296 | 1,419,644 | 1,436,103 |
| <input type="checkbox"/> R2                    | 373         | 0.874%   | 0.373%   | 99,753    | ---       | 10,439    | ---       |

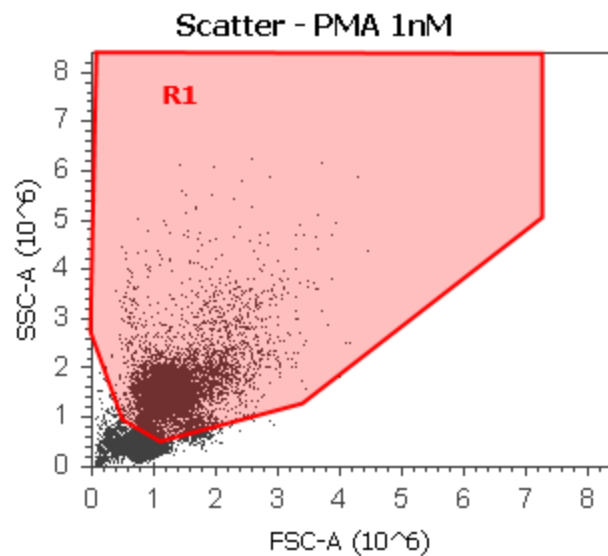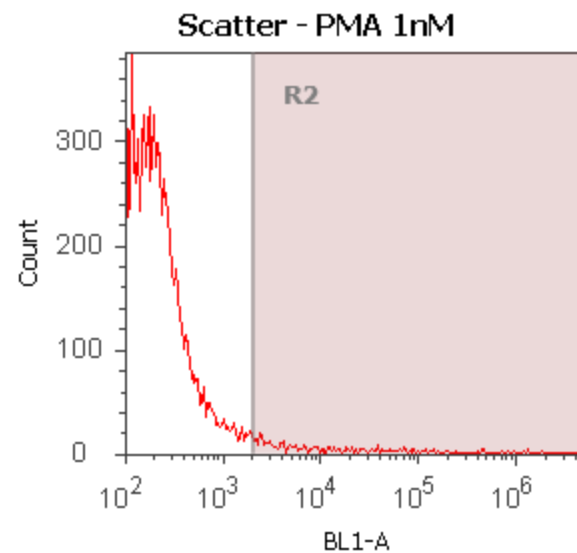

Experiment Name: **08-26-2016 05 00 PM(11)**

Specimen Name: **Specimen**

Sample Name: **PMA 1nM**

| Name                                           | Event Count | % Parent | % Total  | Mean X    | Mean Y    | Median X  | Median Y  |
|------------------------------------------------|-------------|----------|----------|-----------|-----------|-----------|-----------|
| <input checked="" type="checkbox"/> All Events | 100,000     | ---      | 100.000% | 1,093,196 | 917,980   | 977,997   | 536,515   |
| <input checked="" type="checkbox"/> R1         | 44,536      | 44.536%  | 44.536%  | 1,391,244 | 1,582,245 | 1,291,015 | 1,464,761 |
| <input type="checkbox"/> R2                    | 555         | 1.246%   | 0.555%   | 114,332   | ---       | 8,846     | ---       |

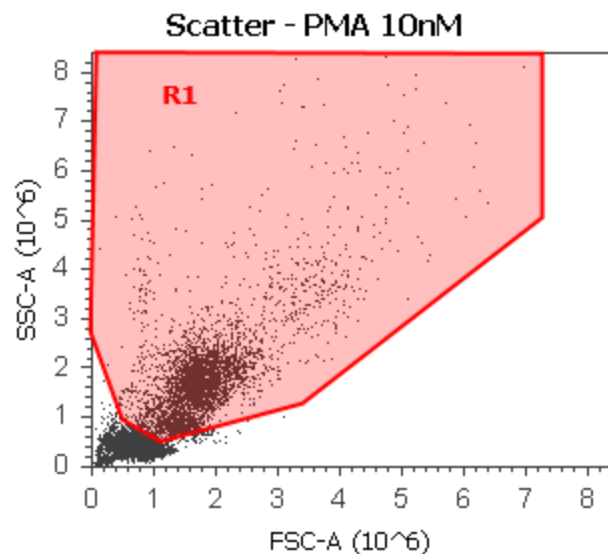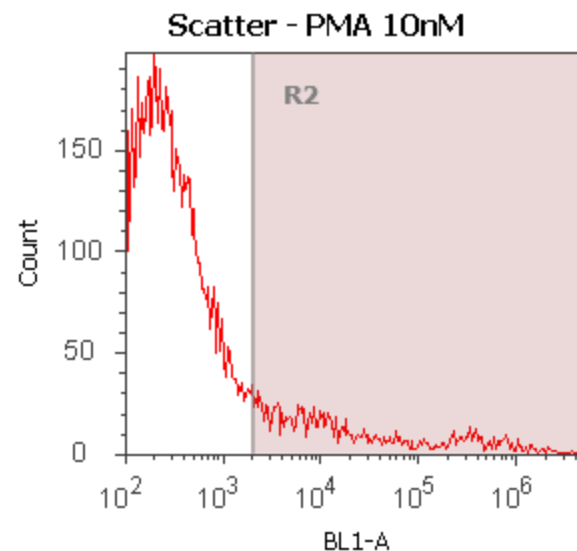

Experiment Name: **08-26-2016 05 00 PM(11)**

Specimen Name: **Specimen**

Sample Name: **PMA 10nM**

| Name                                           | Event Count | % Parent | % Total  | Mean X    | Mean Y    | Median X  | Median Y  |
|------------------------------------------------|-------------|----------|----------|-----------|-----------|-----------|-----------|
| <input checked="" type="checkbox"/> All Events | 100,000     | ---      | 100.000% | 1,028,079 | 786,801   | 803,145   | 427,739   |
| <input checked="" type="checkbox"/> R1         | 25,430      | 25.430%  | 25.430%  | 1,851,876 | 1,859,896 | 1,734,171 | 1,669,964 |
| <input type="checkbox"/> R2                    | 1,519       | 5.973%   | 1.519%   | 134,810   | ---       | 11,274    | ---       |



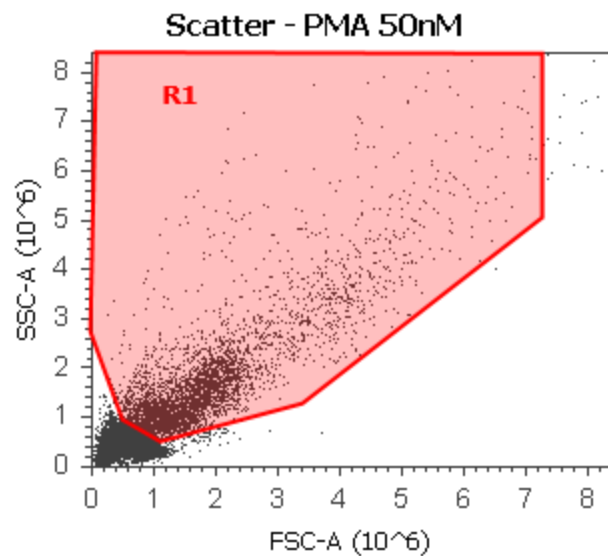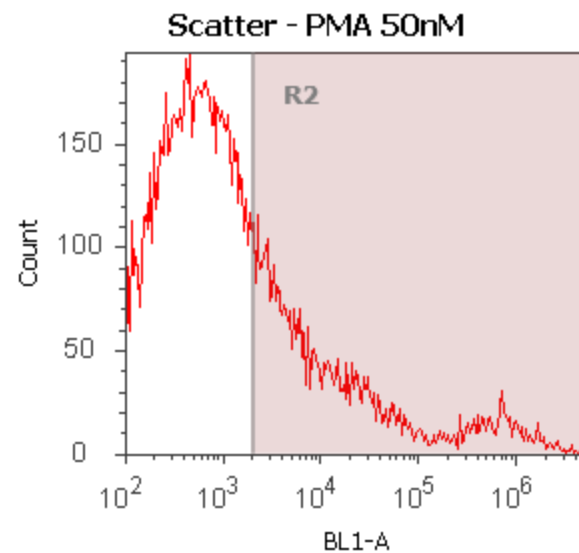

Experiment Name: **08-26-2016 05 00 PM(11)**

Specimen Name: **Specimen**

Sample Name: **PMA 50nM**

| Name                                           | Event Count | % Parent | % Total  | Mean X    | Mean Y    | Median X  | Median Y  |
|------------------------------------------------|-------------|----------|----------|-----------|-----------|-----------|-----------|
| <input checked="" type="checkbox"/> All Events | 100,000     | ---      | 100.000% | 1,024,681 | 888,788   | 702,746   | 490,585   |
| <input checked="" type="checkbox"/> R1         | 25,229      | 25.229%  | 25.229%  | 1,975,529 | 1,846,542 | 1,669,615 | 1,435,191 |
| <input type="checkbox"/> R2                    | 4,826       | 19.129%  | 4.826%   | 142,852   | ---       | 8,595     | ---       |

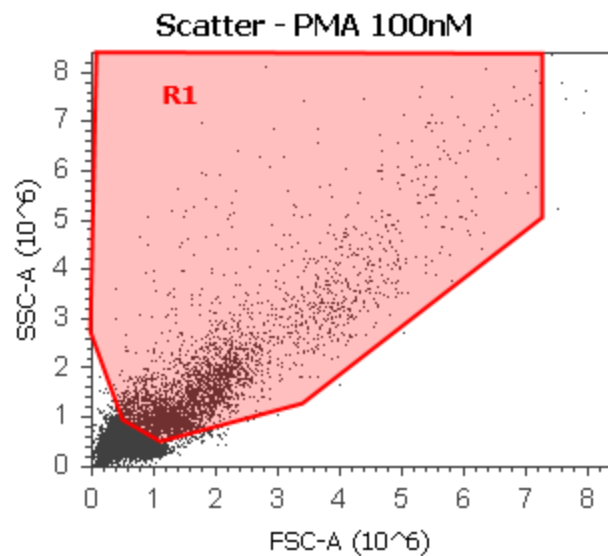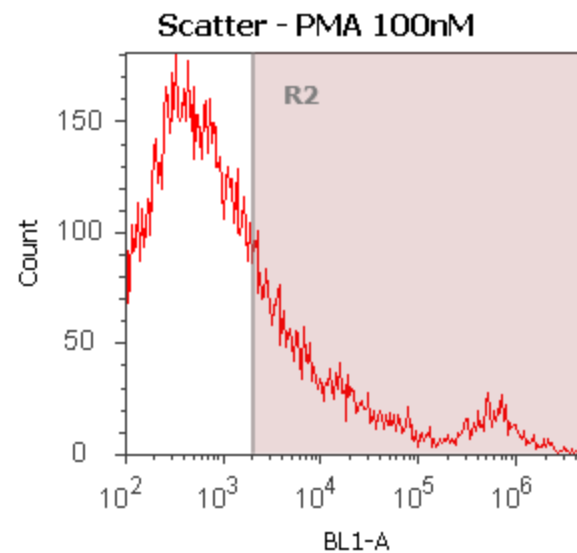

Experiment Name: **08-26-2016 05 00 PM(11)**

Specimen Name: **Specimen**

Sample Name: **PMA 100nM**

| Name                                           | Event Count | % Parent | % Total  | Mean X    | Mean Y    | Median X  | Median Y  |
|------------------------------------------------|-------------|----------|----------|-----------|-----------|-----------|-----------|
| <input checked="" type="checkbox"/> All Events | 100,000     | ---      | 100.000% | 1,012,596 | 837,847   | 717,467   | 466,876   |
| <input checked="" type="checkbox"/> R1         | 23,381      | 23.381%  | 23.381%  | 1,976,317 | 1,828,445 | 1,651,374 | 1,407,362 |
| <input type="checkbox"/> R2                    | 3,989       | 17.061%  | 3.989%   | 144,292   | ---       | 8,393     | ---       |
