# Supplementary material for: Measurement of NET formation in vitro and in vivo by flow cytometry
Source: PubMed Central journal article supplement — Cytometry A. 2017 Jul 17;91(8):822–9. doi: 10.1002/cyto.a.23169 (PMC5601186; doi:10.1002/cyto.a.23169), 2017-07-17
Supplement: CYTO-91-822-s006.pdf [file CYTO-91-822-s006.pdf]

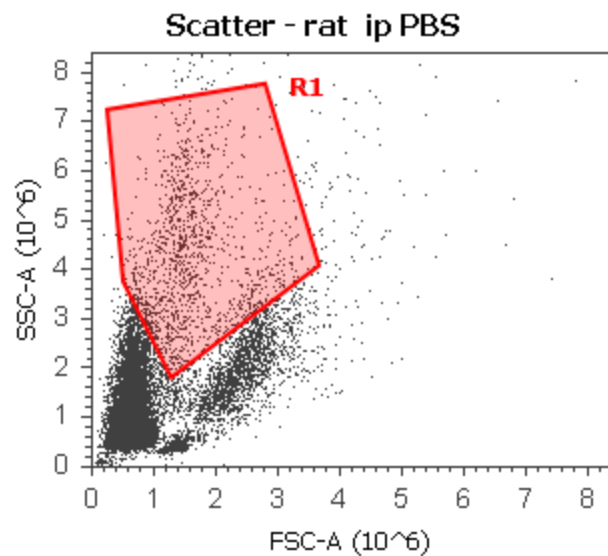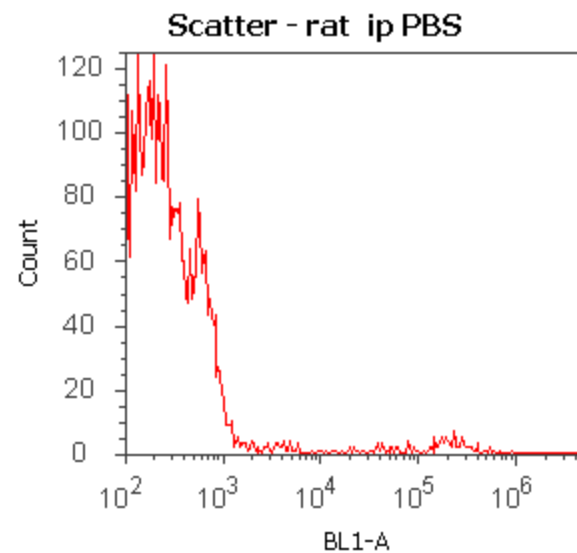

Experiment Name: **07-07-2016 05 00 PM(20)**

Specimen Name: **Specimen**

Sample Name: **rat ip PBS**

| Name                                           | Event Count | % Parent | % Total  | Mean X    | Mean Y    | Median X  | Median Y  |
|------------------------------------------------|-------------|----------|----------|-----------|-----------|-----------|-----------|
| <input checked="" type="checkbox"/> All Events | 100,000     | —        | 100.000% | 1,067,870 | 1,512,075 | 746,566   | 1,030,380 |
| <input checked="" type="checkbox"/> R1         | 9,042       | 9.042%   | 9.042%   | 1,636,228 | 4,145,778 | 1,490,721 | 3,940,693 |

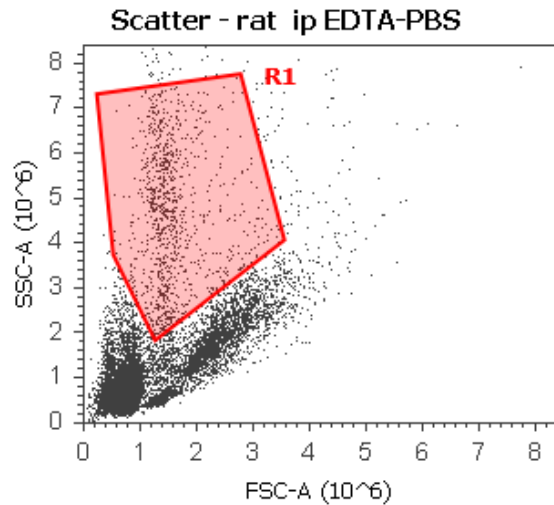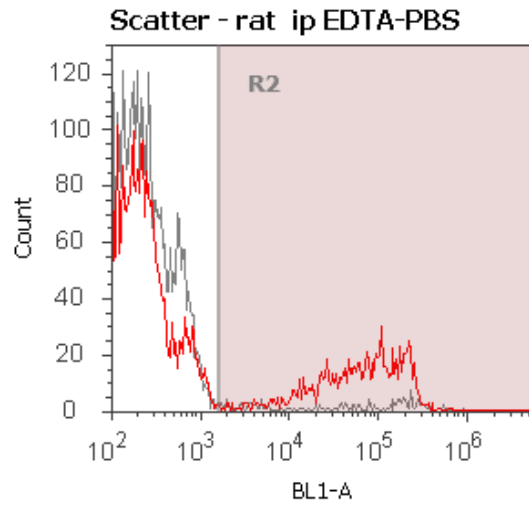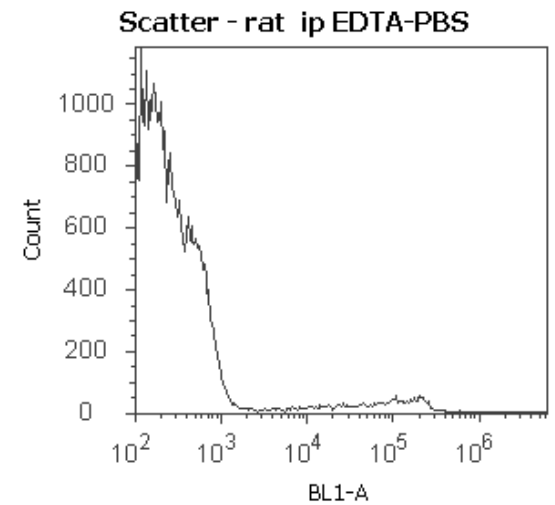

Experiment Name: **07-20-2016 05 00 PM(21)**

Specimen Name: **Specimen**

Sample Name: **rat ip EDTA-PBS**

| Name                                           | Event Count | % Parent | % Total  | Mean X    | Mean Y    | Median X  | Median Y  |
|------------------------------------------------|-------------|----------|----------|-----------|-----------|-----------|-----------|
| <input checked="" type="checkbox"/> All Events | 100,000     | ---      | 100.000% | 1,166,596 | 1,303,915 | 823,478   | 779,624   |
| <input checked="" type="checkbox"/> R1         | 6,732       | 6.732%   | 6.732%   | 1,654,886 | 4,551,444 | 1,523,743 | 4,547,891 |
| <input type="checkbox"/> R2                    | 1,143       | 16.979%  | 1.143%   | 97,130    | ---       | 71,654    | ---       |
